# Supplementary material
Source: ML conference proceedings conference paper supplement (https://openreview.net/forum?id=h3RYh6IBBS)
Supplement: supplementary_material [file attachment]

---

# Revisiting Neural Scaling Laws in Language and Vision

---

**Ibrahim Alabdulmohsin**  
Google Research, Brain Team  
Zürich, Switzerland  
ibomohsin@google.com

**Behnam Neyshabur**  
Google Research, Blueshift Team  
Mountain View, United States  
neyshabur@google.com

**Xiaohua Zhai**  
Google Research, Brain Team  
Zürich, Switzerland  
xzhai@google.com

## Abstract

The remarkable progress in deep learning in recent years is largely driven by improvements in scale, where bigger models are trained on larger datasets for longer schedules. To predict the benefit of scale empirically, we argue for a more rigorous methodology based on the extrapolation loss, instead of reporting the best-fitting (interpolating) parameters. We then present a recipe for estimating scaling law parameters reliably from learning curves. We demonstrate that it extrapolates more accurately than previous methods in a wide range of architecture families across several domains, including image classification, neural machine translation (NMT) and language modeling, in addition to tasks from the BIG-Bench evaluation benchmark. Finally, we release a benchmark dataset comprising of 90 evaluation tasks to facilitate research in this domain.

## 1 Introduction

Scale has led to innovative research in both the vision domain [10, 14, 26, 35, 40] and the natural language processing (NLP) [8, 12] domain. Recent work has found that scaling up the data size [34], the model size [26, 35], the training schedule [5, 39] or all of them together [8, 40] often lead to improved performance. More importantly, scaling up the data size and the model size together can better utilize the compute resources. Scaling laws have been properly studied in several works, e.g. [3, 18–20, 23], and it has been found that the performance  $f(x)$  (e.g. excess loss) often follows a power law  $f(x) \sim \beta x^c$  for some  $\beta > 0$  and  $c < 0$  as one varies a dimension of interest  $x$ , such as the data or the model size.

While theoretical arguments alone seldom predict scaling law parameters in modern neural architectures [2, 21, 32], it has been observed that the benefit of scale could be predicted *empirically* [3, 4, 9, 17, 18, 20, 22, 23, 28, 30, 31]. The general approach is to acquire a *learning curve*, i.e. a collection of samples  $(x, f(x))$ , where  $x$  is a dimension of interest such as the training data size while  $f(x)$  is a measure of performance, such as the validation loss. After that, parameters are estimated, e.g. by computing the best-fitting values of  $\beta$  and  $c$  in the model  $f(x) = \beta x^c$ . Given the estimated scaling law parameters, one can then *extrapolate* by predicting  $f(x)$  for large values of  $x$ .

Such learning curve extrapolation has found many applications, of which four seem to be more prominent. First, it offers a tool for understanding deep neural networks; e.g. how the architecture and data distribution impact scaling behaviors [1–3, 18, 20, 23, 30, 32]. Second, it has been used

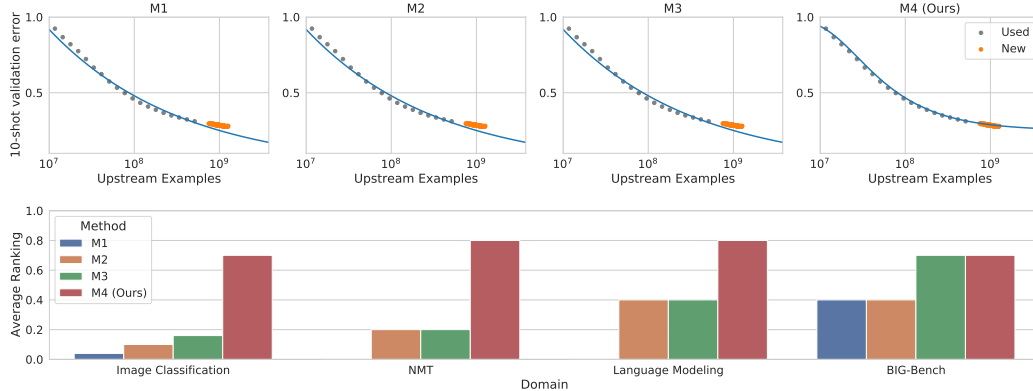

Figure 1: We introduce an estimator  $\mathcal{M}_4$  (see Section 3) of scaling parameters that extrapolates more accurately from learning curves and compare it against previous methods denoted  $\mathcal{M}_1$ ,  $\mathcal{M}_2$ , and  $\mathcal{M}_3$  (see Section 2). **TOP:** The  $y$ -axis is ImageNet 10-shot error rate while the  $x$ -axis is the number of examples in JFT-300M [34] seen during pre-training. The architecture is BiT/101x3 [26] (see Section 5 for further details). Values in **amber** are not seen when fitting the scaling law. **BOTTOM:** Comparison across four domains. We report the fraction of time ( $y$ -axis, higher is better) in which a method achieves the best extrapolation error in the given domain’s tasks (see Section 5). Because several methods may perform equally well in one task, average rankings do not always sum to one.

for sample size planning, particularly in data-scarce domains such as medicine [4, 9, 17, 28]. Third, it can reduce the environmental footprint of experimentation by terminating experiments early and accelerating hyper-parameter search [13, 20, 22]. Forth, it has been applied in neural architecture search (NAS) [15, 20, 25]. In addition, learning curve prediction offers a different methodology for comparing performance; e.g. instead of comparing accuracy on a single dataset, one can also examine the full (hypothetical) scaling curves.

However, in order to achieve such benefits in practice, it is imperative that scaling laws *extrapolate* accurately instead of merely interpolating the learning curve. To our knowledge, a validation of this sort based on extrapolation is often lacking in the literature and previous works have generally reported the best-fitting (interpolating) parameters. We demonstrate why this can be misleading in Section 4, where we illustrate how the scaling exponent  $c$  that extrapolates best can be quite different from the exponent that best fits the given (finite) learning curve. In addition, we propose an estimator for scaling laws denoted  $\mathcal{M}_4$ , which extrapolates more accurately than previous methods as shown in Figure 1. We validate the proposed estimator in several domains, including image classification, neural machine translation, language modeling, and other related tasks.

### Our contributions are:

1. We argue in Section 4 for a more rigorous methodology to validate scaling law parameters based on extrapolation, instead of only reporting the best-fitting (interpolating) parameters.
2. We propose a recipe in Section 3 to estimate scaling laws reliably from learning curves. The new estimator is verified across several domains: image classification, neural machine translation (NMT), language modeling, and tasks from BIG-Bench evaluation benchmark [6].
3. We use the proposed recipe to study the impact of the neural architecture’s type and size on scaling exponents.
4. We release a benchmark dataset consisting of 90 tasks to accelerate research in scaling laws.

## 2 Related work

Power law scaling in deep neural architectures has been verified in a wide range of domains, including image classification [2, 20, 32, 40], language modeling [20, 23, 32], NMT [3, 18–20], and speech recognition [20]. To explain this theoretically, at least for data scaling, several works have argued

for a power law behavior under various contexts. For instance, in the universal learning setting [7] under the realizable case with a 0-1 misclassification loss, power law scaling emerges with exponent  $c = 1$  if the hypothesis space has an infinite Littlestone tree but not an infinite VC-Littlestone tree [7]. Another argument for the exponent  $c = 1$  can be made in the non-realizable setting if the chosen loss is sufficiently smooth and the model size is limited by deriving the variance of the empirical solution around its population limit [2]. A more relevant setting for deep neural networks is to assume that the model size is effectively infinite and the loss is Lipschitz continuous (e.g. continuous loss in bounded domains). Under the latter assumptions, it has been argued that the scaling exponent would satisfy  $c = O(1/d)$  where  $d$  is the intrinsic dimension of the data manifold [2, 21, 32]. This is consistent with the fact that scaling exponents often satisfy  $c \ll 1$  and that the exponent seems to be independent of the neural network architecture size as long as the architecture is sufficiently large [20, 23, 32].

Writing  $x$  for the dimension of interest (e.g. data size) and  $\varepsilon_x$  for the error/loss of the model as a function of  $x$ , three function classes have been used in the literature to model the performance  $\varepsilon_x$  as a function of  $x$  while capturing its expected power law behavior:

- $\mathcal{M}_1$  : The simplest model assumes a power law throughout the domain of  $x$ :  $\varepsilon_x = \beta x^c$ . This has been used, for example, to estimate the required sample size in healthcare [9], neural machine translation (NMT) [19], and language models [23], among others [20, 22, 32].
- $\mathcal{M}_2$  : To capture saturating performance for large  $x$  (i.e. when the Bayes optimal risk is bounded away from zero), a parameter  $\varepsilon_\infty$  is added:  $\varepsilon_x - \varepsilon_\infty = \beta x^c$ . This is, perhaps, the most commonly used model in the literature; see for instance [1, 13, 17, 19, 20, 22, 28, 30, 31].
- $\mathcal{M}_3$  : A different parameterization has been recently used in NMT [3]:  $\varepsilon_x = \beta(x^{-1} + \gamma)^{-c}$ , where  $\beta > 0, \gamma \geq 0$  and  $c < 0$ . Variants of this approach were used previously in studying, for example, scaling laws in vision transformers [40], accelerating hyper-parameter optimization [13], and (more generally) in learning curve prediction [25].

In this work, we introduce a fourth estimator  $\mathcal{M}_4$  and verify experimentally that it outperforms the above methods in terms of its extrapolation capability in several domains, as summarized in Figure 1. We describe  $\mathcal{M}_4$  and discuss its rationale in Section 3.

### 3 The Scaling Law Estimator $\mathcal{M}_4$

**Motivation.** The function class  $\mathcal{M}_2$ , in which it is assumed that  $\varepsilon_x = \varepsilon_\infty + \beta x^c$ , captures (by definition) what it means for the excess risk to follow a power law. Hence, a question naturally arises: do we need any other function classes to estimate the scaling law parameters  $\varepsilon_\infty, \beta$  and  $c$ ?

To see why using  $\mathcal{M}_2$  can occasionally fail, consider the following simple classification problem whose optimal Bayes risk is known. Suppose that the instances  $\mathbf{x} \in \mathbb{S}^{d-1}$  are generated uniformly at random from the unit sphere  $\mathbb{S}^{d-1} = \{\mathbf{x} \in \mathbb{R}^d : \|\mathbf{x}\|_2 = 1\}$ . In addition, let the (ground-truth) labeling function be given by:

$$y(\mathbf{x}) = \begin{cases} \mathbf{sign}(\langle \mathbf{w}^*, \mathbf{x} \rangle), & \text{with probability } 1 - \delta \\ -\mathbf{sign}(\langle \mathbf{w}^*, \mathbf{x} \rangle), & \text{otherwise,} \end{cases}$$

for some fixed  $\mathbf{w}^* \in \mathbb{S}^{d-1}$ . If a classifier is trained using, for example, logistic regression, the misclassification error rate  $\varepsilon_x$  of the learning algorithm as a function of the data size  $x$  would typically undergo three stages as illustrated in Figure 2 [20]. First, we have saturating performance for small sample sizes shown on the left, in which the trained model does not perform much better than random guessing. Second, we have a transitional stage in which the performance of the model improves quickly but it does not constitute a power law yet. Third, we have the final power law regime in which the excess risk  $\varepsilon_x - \varepsilon_\infty$  fits a power law curve.

Let  $\mathcal{D}_0 = \{(x, \varepsilon_x)\}$  be the learning curve and write  $\mathcal{D}_\tau = \{(x, \varepsilon_x) : x \geq \tau\} \subseteq \mathcal{D}_0$  for the restriction of the learning curve to  $x \geq \tau$ . To extrapolate from a learning curve, we train each of the four models  $\mathcal{M}_1, \mathcal{M}_2, \mathcal{M}_3$ , and  $\mathcal{M}_4$  on the learning curve after applying a cutoff  $\tau$  to mitigate the effect of small data samples. Then, we plot the excess risk  $\varepsilon_x - \varepsilon_\infty^*$  predicted by each model, where  $\varepsilon_\infty^* = \delta$  is the (ground-truth) Bayes risk. Since  $\varepsilon_\infty^*$  is known exactly, an accurate model that extrapolates well would produce a *linear* curve in each plot. As shown in Figure 2,  $\mathcal{M}_2$  is accurate only when the data resides entirely in the power law regime (rightmost figure), whereas  $\mathcal{M}_4$  works well in all cases.

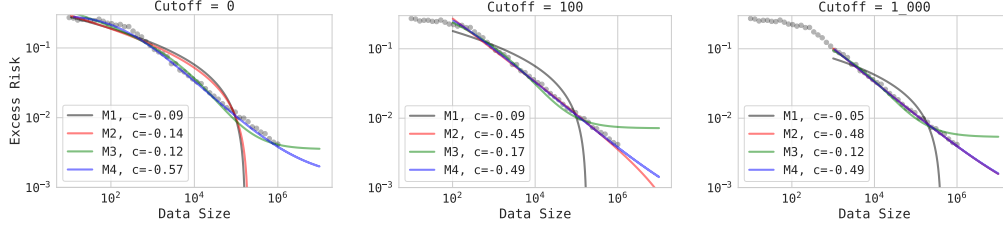

Figure 2: The excess risk  $\varepsilon_x - \varepsilon_\infty^*$  is plotted against the training data size for logistic regression where instances  $\mathbf{x} \in \mathbb{R}^d$  are drawn uniformly at random from the surface of the unit sphere and the label is binary  $\mathbf{y} \in \{-1, +1\}$  with noise rate  $\delta$  (see Section 3). In this experiment,  $d = 100$  and  $\delta = 0.2$ . In each figure, only the data sizes that exceed the indicated cutoff value are used to estimate the scaling law parameters.  $\mathcal{M}_2$  is accurate only when the data resides entirely in the power law regime (rightmost figure), whereas  $\mathcal{M}_4$  works well in all cases.

**Derivation.** The function class  $\mathcal{M}_4$  arises from several natural requirements. First, we would like our function class to be sigmoid-like so that it fails only gracefully when the data deviates from the expected power law behavior; e.g. to avoid failures like that of  $\mathcal{M}_1$  and  $\mathcal{M}_2$  in Figure 2(left). Second, we would like our function class  $\mathcal{F}$  to reduce to power law functions  $f(x) \rightarrow \varepsilon_\infty + \beta x^c$  as  $x \rightarrow \infty$ . More precisely, we require that:

$$\forall f \in \mathcal{F} : \exists c < 0, \delta > 0 : \lim_{x \rightarrow \infty} \frac{\log(f(x) - \delta)}{\log x} = c. \quad (1)$$

To reiterate, this is because power law behavior has been empirically verified in a wide range of domains (see Section 2). Third, we would like our function class  $\mathcal{F}$  to be expressive enough to contain all of the functions in  $\mathcal{M}_2$ , i.e.  $\mathcal{M}_2 \subset \mathcal{M}_4$ , so that using  $\mathcal{M}_4$  becomes equivalent to using  $\mathcal{M}_2$  when the observed learning curve resides entirely in the power law regime.

If we take the first requirement above on the shape of the function, a general approach to achieve this is to write the performance as a convex combination of the form:

$$\varepsilon_x = \gamma(x)(1 + \gamma(x))^{-1} \varepsilon_0 + (1 + \gamma(x))^{-1} \varepsilon_\infty, \quad (2)$$

for some function  $\gamma(x)$  that satisfies  $\lim_{x \rightarrow \infty} \gamma(x) = 0$  and  $\lim_{x \rightarrow 0} \gamma(x) = \infty$ . Here,  $\varepsilon_\infty$  is the predicted limiting performance when  $x \rightarrow \infty$  while  $\varepsilon_0$  is the performance at the random-guessing level. To meet the second requirement, we set  $\gamma(x) = \beta x^c$  for some learnable parameters  $\beta > 0$  and  $c < 0$ . Rearranging the terms yields  $(\varepsilon_x - \varepsilon_\infty) \cdot (\varepsilon_0 - \varepsilon_x)^{-1} = \gamma(x) \doteq \beta x^c$ . Finally, we introduce a learnable parameter  $\alpha > 0$  to meet our final requirement (see the ablation in Appendix A.1):

$$\frac{\varepsilon_x - \varepsilon_\infty}{(\varepsilon_0 - \varepsilon_x)^\alpha} = \beta x^c. \quad (\mathcal{M}_4)$$

With  $\alpha = 0$ , our function class  $\mathcal{M}_4$  reduces to  $\mathcal{M}_2$  as required. By differentiating both sides of the equation above and noting that  $c < 0$ , we deduce that  $\varepsilon_x$  remains a monotone decreasing function of  $x$  for all  $\alpha \geq 0$  as expected. In addition, by rearranging terms and using both the binomial theorem and the Lagrange series inversion theorem, we have the following asymptotic expansion for the excess loss  $\varepsilon_x - \varepsilon_\infty$  as  $x \rightarrow \infty$ :

$$\varepsilon_x - \varepsilon_\infty \sim (\varepsilon_0 - \varepsilon_\infty)^\alpha (\beta x^c) - \alpha (\varepsilon_0 - \varepsilon_\infty)^{2\alpha-1} (\beta x^c)^2 \quad (3)$$

When  $\alpha = 0$ , we recover the power law estimator  $\mathcal{M}_2$ . Setting  $\alpha > 0$  allows  $\mathcal{M}_4$  to handle measurements that deviate from the power law behavior; i.e. when the learning curve does not fall into the asymptotic power law regime. The difference is  $O(\alpha x^{2c})$  (suppressing other constants).

The parameters to be fitted here are  $\alpha \geq 0$ ,  $\beta > 0$ ,  $c < 0$  and  $\varepsilon_\infty > 0$ . The parameter  $\varepsilon_0$  corresponds to the value of the loss at the random-guessing level and can be either fixed or optimized. We fix  $\varepsilon_0$  in our evaluation to be equal to the loss at the random-guessing level, although we observe similar results when it is optimized.

**Loss Function.** In this work, scaling law parameters in all the four function classes are estimated by minimizing the square-log loss, similar to the approach used in [28]. This serves two purposes. First, it penalizes the *relative* loss and, hence, treats errors at all scales equally. Second, it allows us to compute a subset of the parameters in closed-form using least squares.

Specifically, in  $\mathcal{M}_4$ , for example, we minimize:

$$\mathcal{L}(\alpha, \beta, c, \varepsilon_\infty) = \mathbb{E}_{\mathbf{x}} \left[ (\log(\varepsilon_x - \varepsilon_\infty) - \alpha \log(\varepsilon_0 - \varepsilon_x) - \log \beta - c \log x)^2 \right]. \quad (4)$$

In  $\mathcal{M}_2$ , we optimize the same loss above while fixing  $\alpha = 0$ . In  $\mathcal{M}_1$ , we fix both  $\alpha$  and  $\varepsilon_\infty$  to zero. In  $\mathcal{M}_3$ , we optimize the following loss:

$$\mathcal{L}(\beta, c, \gamma) = \mathbb{E}_{\mathbf{x}} \left[ (\log \varepsilon_x - \log \beta - c \log(x^{-1} + \gamma))^2 \right]. \quad (5)$$

In all function classes, we use block coordinate descent, where we compute  $\alpha$ ,  $\beta$  and  $c$  in closed form using least squares, and estimate the remaining parameters (if any) using gradient descent, with a learning rate of  $10^{-7}$ . We repeat this until convergence.

## 4 Validating Scaling Laws using the Extrapolation Error

A common approach in the literature for estimating scaling law parameters is to assume a parametric model, e.g.  $\mathcal{M}_2$ , and reporting its best-fitting parameters to an empirical learning curve (see for example the prior works discussed in Section 2). Afterwards, patterns are reported about the behavior of the scaling law parameters; e.g. how the exponent varies with the architecture size. We argue, next, for a more rigorous methodology based on the *extrapolation* loss, instead of only reporting the best-fitting (interpolating) parameters. Specifically, choices of scaling law parameters that achieve a small interpolation error do not necessarily achieve a small extrapolation error so they may not, in fact, be valid estimates of scaling law parameters. Scaling law parameters should be validated by measuring how well they *extrapolate*.

To see why a validation of this sort matters, consider the following example. If we pretrain a vision transformer ViT/B/16 [14] on subsets of JFT-300M (a proprietary dataset with 300M examples and 18k classes [34]) using the Adam optimizer [24]<sup>1</sup>, and evaluate the 10-shot error rate on ImageNet-ILSRCV2012 [11], we obtain the learning curve shown in Figure 3(left, in green). Evidently, power law emerges; i.e. ImageNet 10-shot error rate (shown in green) follows a linear curve on a log-log plot. Hence, one might estimate, for example the scaling exponent  $c$  using least squares.

However, consider now the family of curves shown in Figure 3(left), all corresponding to  $\mathcal{M}_2$  but with scaling exponents that vary from about  $c = -0.24$  to  $c = -0.4$  (while fitting the parameters  $\beta$  and  $\varepsilon_\infty$ ). Note that all five curves overlap with each other significantly. Choosing the best fitting parameters on the learning curve would favor a scaling exponent of  $c = -0.24$  as shown in Figure 3(right). However, if we validate the parameters by evaluating how well they *extrapolate* (i.e. how well they predict performance when the number of seen examples  $x \gg 10^9$ ), a different picture emerges. We observe that a more accurate estimate of the scaling exponent is  $c = -0.40$ . This is shown in Figure 3(left) and in Figure 3(right) by measuring the extrapolation loss. Here, validation is measured using the root mean square error (RMSE) to the log-loss:

$$\text{RMSE} = \sqrt{\mathbb{E}_{\mathbf{x}} (\log \hat{\varepsilon}_{\mathbf{x}} - \log \varepsilon_{\mathbf{x}})^2} \quad (6)$$

in which  $\mathbf{x}$  is uniform over the set  $[10^9, 2 \times 10^9]$ , where  $\hat{\varepsilon}_{\mathbf{x}}$  is the predicted loss while  $\varepsilon_{\mathbf{x}}$  is the actual. We apply the logarithm so that we penalize the relative error and, hence, assign equal importance to all error scales (both large and small)<sup>2</sup>.

In summary, scaling law parameters that give the best fit on the learning curve (i.e. lowest interpolation loss) do not generally extrapolate best. When using extrapolation loss instead, different scaling law parameters emerge. In this work, we use extrapolation to evaluate the quality of scaling law estimators.

<sup>1</sup>with a base learning rate of 5e-4, batch-size 4,096, and dropout rate of 0.1

<sup>2</sup>E.g. if we have a single measurement  $x$  where  $\varepsilon_x = 0.99$  and the estimator predicts  $\hat{\varepsilon}_x = 1.0$ , the RMSE in (6) is approximately equal to 1%. Similarly, it is approximately equal to 1% when  $\varepsilon_x = 0.099$  while  $\hat{\varepsilon}_x = 0.1$ .

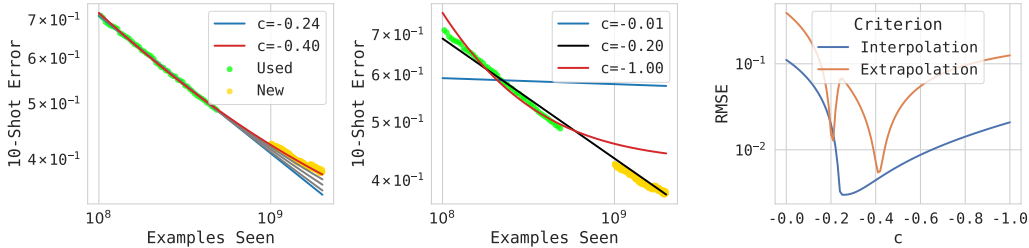

Figure 3: In this experiment, ViT/B/16 [14] is pretrained on JFT-300M [34], where the evaluation metric is 10-shot ImageNet error rate. **LEFT & MIDDLE**: the learning curve is plotted. Different scaling exponents using the function class  $\mathcal{M}_2$  can fit the learning curve almost equally well. Values in green correspond to the data used to train the scaling law estimator (up to 500M seen examples) while values in yellow are used to evaluate the extrapolation loss. **RIGHT**: Best fitting parameters do not necessarily coincide with the scaling parameters that achieve small *extrapolation* loss.

Table 1: A list of the six architectures used in the evaluation study in the image classification domain.

| Residual Nets |              | Vision Transformers |              | MLP Mixers |              |
|---------------|--------------|---------------------|--------------|------------|--------------|
| Model         | # Parameters | Model               | # Parameters | Model      | # Parameters |
| BiT/50/1      | 61M          | ViT/S/16            | 32M          | MiX/B/16   | 73M          |
| BiT/101/3     | 494M         | ViT/B/16            | 110M         | MiX/L/16   | 226M         |

## 5 Experiments

We provide an empirical evaluation of the four scaling law estimators in several domains, including image classification (72 tasks), neural machine translation (5 tasks), language modeling (5 tasks), and other language-related evaluations (10 tasks). The dataset for neural machine translation is available at [3]. The code and dataset for the remaining tasks used in this evaluation are made publicly available to facilitate further research in this domain<sup>3</sup>. In all experiments, we divide the learning curve into two splits: (1) one split used for training the scaling law estimators, and (2) one split used for evaluating extrapolation. Setting  $\tau = x_{max}/2$ , where  $x_{max}$  is the maximum value of  $x$  in the data, the first split is the domain  $x \in [0, \tau]$  while the second split is the domain  $x \in (\tau, 2\tau]$ . We measure extrapolation error using RMSE in (6). All experiments are executed on Tensor Processing Units (TPUs).

### 5.1 Image Classification

**Architectures and Tasks.** We use three families of architectures: (1) big-transfer residual neural networks (BiT) [26], (2) vision transformers (ViT) [14], and (3) MLP mixers (MiX) [37]. For each family, we have two models of different sizes as shown in Table 1 in order to assess the impact of the size of the architecture on the scaling parameters. We pretrain on JFT-300M [34]. Since pre-training task performance is not representative of the downstream performance [40], we evaluate the few-shot accuracy downstream on four datasets: (1) ImageNet [11], (2) Birds 200 [38], (3) CIFAR100 [27], and (4) Caltech101 [16]. For each dataset, we report 5/10/25-shot accuracy. It results in 72 tasks for the combinations of architecture, dataset, and metric. Following [14, 26], we removed duplicate pre-training examples between upstream JFT-300M dataset and all the downstream train and test sets.

**Bootstrapped Examples.** In the few-shot image classification setting under the transfer learning setup, overfitting can occur if the upstream dataset is small, where training beyond a particular number of steps would reduce the downstream validation accuracy. This is demonstrated in Figure 4, where we pretrain on subsets of JFT-300M (upstream) and evaluate ImageNet 10-shot error (downstream).

Nevertheless, we observe that prior to reaching peak performance, training examples behave as if they were fresh samples. This observation generalizes the bootstrapping phenomenon observed in

<sup>3</sup>Code and benchmark dataset will be made available at: [https://github.com/google-research/google-research/tree/master/revisiting\\_neural\\_scaling\\_laws](https://github.com/google-research/google-research/tree/master/revisiting_neural_scaling_laws).

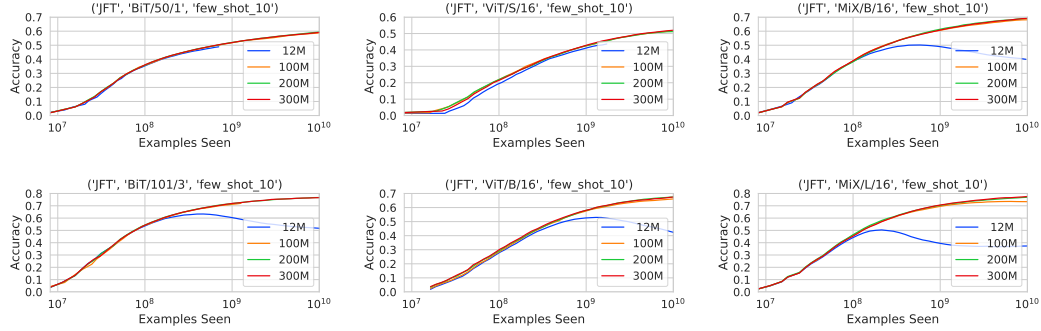

Figure 4: In this experiment, we pretrain each vision architecture on subsets of JFT-300M [34] and report the 10-shot ImageNet accuracy [11]. When the architecture is pretrained on a subset of size 12M, we observe overfitting, where the performance begins to *drop* if the model is pretrained for a large number of steps. Nevertheless, prior to reaching peak performance, training examples behave as if they are fresh samples, which is consistent with the earlier observations reported in [29].

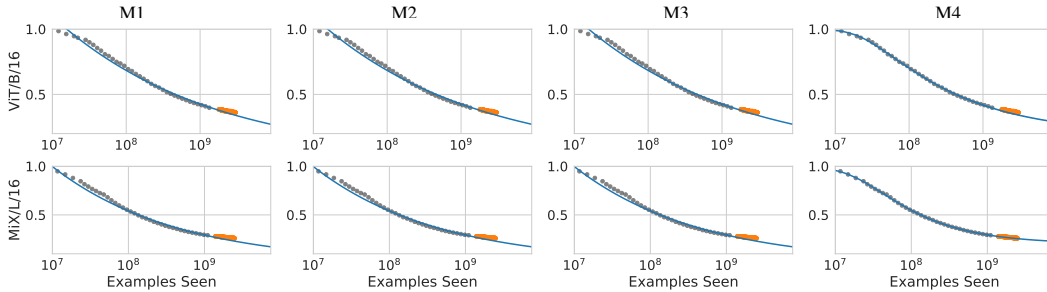

Figure 5: ImageNet 10-shot accuracy ( $y$ -axis) vs. the number of bootstrapped examples seen during upstream training in ViT/B/16 and MiX/L/16 (see Figure 1 for BiT/101x3 and Appendix A.3 for all remaining figures). The curves in each column correspond to the scaling law learned using the corresponding function class. The values marked in amber are reserved for evaluating how well the scaling law parameters extrapolate. Generally,  $\mathcal{M}_4$  extrapolates better than previous methods.

[29], where it showed that training examples behave as fresh samples prior to convergence, which would be equivalent to our observation if no overfitting occurs. Throughout the sequel, we refer to the examples seen during training prior to peak performance as “bootstrapped examples” and use their number as the independent variable  $x$  when evaluating the scaling law estimators in this section.

Figure 5 illustrates how well each of the the four scaling law estimators  $\mathcal{M}_1$ ,  $\mathcal{M}_2$ ,  $\mathcal{M}_3$ , and  $\mathcal{M}_4$  can extrapolate from a given learning curve. The complete set of figures is provided in Appendix A.3. We observe that  $\mathcal{M}_4$  extrapolates better than other methods and produces learning curves that approximate the empirical results more faithfully. As shown in Figure 1,  $\mathcal{M}_4$  outperforms the other methods in more than 70% of the tasks in this domain.

**Impact of the Architecture.** Figure 6 plots the scaling exponent  $c$  in each architecture when the downstream task is  $n$ -shot accuracy on ImageNet. We observe that within each family of models, larger models have more favorable scaling exponents. In addition,  $\mathcal{M}_4$  yields estimates of the scaling exponents that are larger in absolute magnitude than in other methods. Figure 7 shows that such differences in scaling exponents show up indeed in the slopes of the learning curves as expected.

## 5.2 Neural Machine Translation (NMT)

Next, we evaluate the scaling law estimators on NMT. We use the setup studied in [3], in which models are trained with the per-token cross-entropy loss using Adafactor optimizer [33] with a batch-size of 500K tokens and a dropout rate of 0.1 [3]. We use the encoder-decoder transformer models 6L6L, 28L6L and 6L28L, where 28L6L means that the architecture has 28 encoders and 6 decoders. We also use the two architectures: decoder-only with language modeling loss (D/LM) and the transformer-encoder with LSTM decoder (TE/LSTM). These correspond to the architectures used

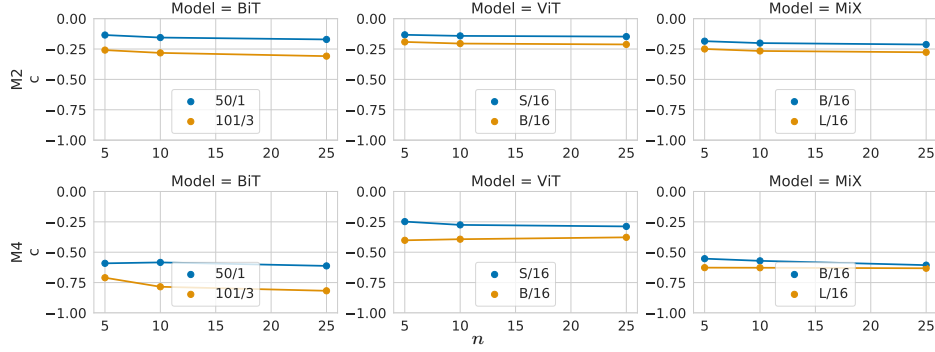

Figure 6: The scaling exponent  $c$  is plotted for each architecture when pretraining on subsets of JFT-300M and evaluating performance using  $n$ -shot accuracy on ImageNet, where  $n$  is the  $x$ -axis. Top row is for  $\mathcal{M}_2$  (nearly identical in this case to  $\mathcal{M}_3$ ) while the bottom row is for  $\mathcal{M}_4$ . We observe that  $\mathcal{M}_4$  suggests more favorable scaling behavior (larger estimates of the scaling exponents) than in previous methods. Also, larger architectures within the model the same family have more favorable exponents.

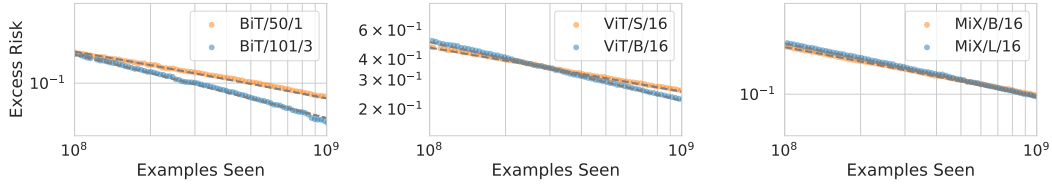

Figure 7: The excess risk of 10-shot ImageNet classification when pretraining on JFT-300M is plotted against the number of examples seen upstream. The slope of each curve is its scaling exponents  $c$ .

in Figure 1 in [3]. In all cases, performance is measured using log-perplexity on a hold-out dataset. To evaluate the accuracy of the scaling law estimator, we fit its parameters on the given learning curve (for up to 256M sentence pairs) and use it to predict the log-perplexity when the architecture is trained on 512M sentence pairs. Because the learning curves contain few points, we only evaluate on the 512M sentence pairs. Table 2 displays the RMSE of each estimator. Clearly,  $\mathcal{M}_4$  performs better than the other methods as summarized in Figure 1, which is consistent with the earlier results in image classification.

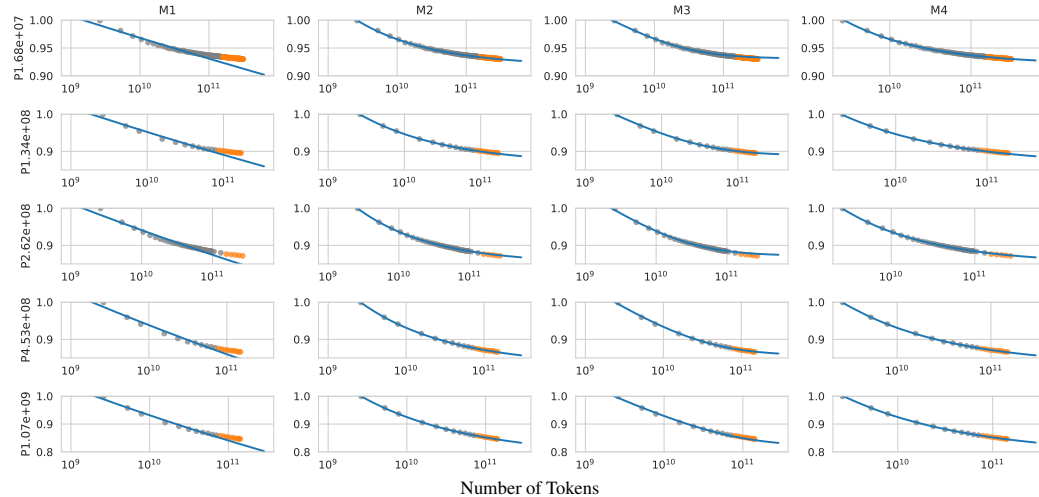

Figure 8: We evaluate scaling law estimators on language modeling tasks (see Section 5.3) with various model sizes indicated in the left side of each row. Table 2 provides the RMSE scores.



Table 2: Extrapolation RMSE of the scaling law estimators on the five NMT tasks (top) and the five language modeling tasks. See Sections 5.2 and 5.3 for further details.

| Model                     | M1                           | M2                           | M3                           | M4                           |
|---------------------------|------------------------------|------------------------------|------------------------------|------------------------------|
| NMT                       |                              |                              |                              |                              |
| 6 Enc, 6 Dec Layers       | $2.6 \times 10^{-1}$         | $3.9 \times 10^{-2}$         | $8.9 \times 10^{-2}$         | $1.0 \times 10^{-2}$         |
| 28 Enc, 6 Dec Layers      | $1.7 \times 10^{-1}$         | $5.6 \times 10^{-2}$         | $3.3 \times 10^{-2}$         | $1.3 \times 10^{-2}$         |
| 6 Enc, 28 Dec Layers      | $2.3 \times 10^{-1}$         | $5.3 \times 10^{-2}$         | $1.6 \times 10^{-2}$         | $3.0 \times 10^{-2}$         |
| Decoder-only /LM          | $2.5 \times 10^{-1}$         | $3.9 \times 10^{-2}$         | $8.9 \times 10^{-2}$         | $1.0 \times 10^{-2}$         |
| Transformer Enc /LSTM Dec | $1.9 \times 10^{-1}$         | $1.3 \times 10^{-2}$         | $6.2 \times 10^{-2}$         | $1.2 \times 10^{-2}$         |
| Language Modeling         |                              |                              |                              |                              |
| 1.68e+07                  | $1.5 \pm 0.1 \times 10^{-2}$ | $6.0 \pm 1.0 \times 10^{-4}$ | $2.5 \pm 0.2 \times 10^{-3}$ | $3.1 \pm 0.7 \times 10^{-4}$ |
| 1.34e+08                  | $1.6 \pm 0.3 \times 10^{-2}$ | $1.7 \pm 0.4 \times 10^{-3}$ | $6.6 \pm 3.0 \times 10^{-4}$ | $1.9 \pm 0.4 \times 10^{-3}$ |
| 2.62e+08                  | $2.3 \pm 0.5 \times 10^{-2}$ | $1.9 \pm 0.5 \times 10^{-3}$ | $5.2 \pm 0.9 \times 10^{-3}$ | $1.8 \pm 0.5 \times 10^{-3}$ |
| 4.53e+08                  | $1.7 \pm 0.4 \times 10^{-2}$ | $7.4 \pm 5.5 \times 10^{-4}$ | $6.6 \pm 3.8 \times 10^{-4}$ | $7.5 \pm 5.7 \times 10^{-4}$ |
| 1.07e+09                  | $1.7 \pm 0.4 \times 10^{-2}$ | $1.7 \pm 0.3 \times 10^{-3}$ | $4.5 \pm 0.4 \times 10^{-3}$ | $1.3 \pm 0.2 \times 10^{-3}$ |

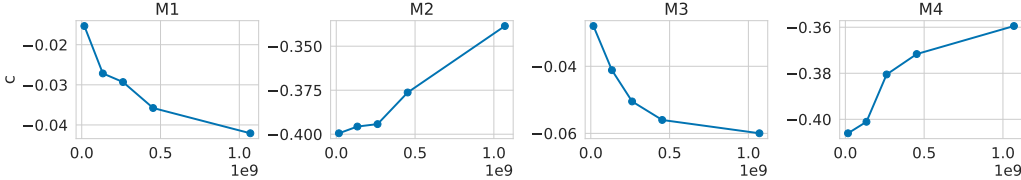

Figure 9: Scaling exponent  $c$  is plotted against the language model size. Unlike in image classification with transfer learning (see Figure 6),  $|c|$  seems to decrease using  $\mathcal{M}_4$  as the model size increases.

Table 3: A summary of BIG-Bench evaluation results using the extrapolation RMSE in (6). See Section 5.4 for further details. Both  $\mathcal{M}_3$  and  $\mathcal{M}_4$  perform best in this domain.

|                             | M1                           | M2                           | M3                           | M4                           |
|-----------------------------|------------------------------|------------------------------|------------------------------|------------------------------|
| linguistic_mappings: 1-shot | $1.6 \pm 0.2 \times 10^{-2}$ | $1.6 \pm 0.1 \times 10^{-2}$ | $1.6 \pm 0.2 \times 10^{-2}$ | $1.7 \pm 0.2 \times 10^{-2}$ |
| linguistic_mappings: 2-shot | $1.7 \pm 0.2 \times 10^{-2}$ | $1.7 \pm 0.2 \times 10^{-2}$ | $1.7 \pm 0.2 \times 10^{-2}$ | $9.2 \pm 1.4 \times 10^{-3}$ |
| qa_wikidata: 1-shot         | $4.2 \pm 2.3 \times 10^{-3}$ | $4.4 \pm 2.1 \times 10^{-3}$ | $4.2 \pm 2.3 \times 10^{-3}$ | $4.4 \pm 2.1 \times 10^{-3}$ |
| qa_wikidata: 2-shot         | $4.4 \pm 1.9 \times 10^{-3}$ | $4.7 \pm 1.7 \times 10^{-3}$ | $4.4 \pm 1.9 \times 10^{-3}$ | $4.9 \pm 1.7 \times 10^{-3}$ |
| unit_conversion: 1-shot     | $8.3 \pm 1.3 \times 10^{-3}$ | $8.1 \pm 1.3 \times 10^{-3}$ | $1.5 \pm 0.7 \times 10^{-3}$ | $2.3 \pm 0.6 \times 10^{-3}$ |
| unit_conversion: 2-shot     | $1.1 \pm 0.1 \times 10^{-2}$ | $1.1 \pm 0.1 \times 10^{-2}$ | $7.5 \pm 0.2 \times 10^{-3}$ | $2.9 \pm 1.2 \times 10^{-3}$ |
| mult_data_wrangling: 1-shot | $1.1 \pm 0.3 \times 10^{-2}$ | $1.1 \pm 0.3 \times 10^{-2}$ | $1.1 \pm 0.3 \times 10^{-2}$ | $1.3 \pm 0.3 \times 10^{-2}$ |
| mult_data_wrangling: 2-shot | $1.6 \pm 0.4 \times 10^{-2}$ | $1.6 \pm 0.4 \times 10^{-2}$ | $1.6 \pm 0.4 \times 10^{-2}$ | $6.2 \pm 2.2 \times 10^{-3}$ |
| date_understanding: 1-shot  | $3.2 \pm 0.3 \times 10^{-2}$ | $3.2 \pm 0.3 \times 10^{-2}$ | $4.7 \pm 0.4 \times 10^{-3}$ | $1.5 \pm 1.3 \times 10^{-2}$ |
| date_understanding: 2-shot  | $2.9 \pm 1.9 \times 10^{-2}$ | $2.9 \pm 1.9 \times 10^{-2}$ | $4.8 \pm 1.2 \times 10^{-3}$ | $1.8 \pm 1.6 \times 10^{-2}$ |

### 5.3 Language Modeling

Next, we evaluate the scaling law estimators in language modeling, where the goal is to predict the next token. We use the LaMDA architecture used in [36], which is a decoder-only transformer language model. Five model sizes are used, ranging from  $10^7$  to  $10^9$  model parameters. In each model, we rescale validation loss to the unit interval  $[0, 1]$ . Figure 8 and Table 2 summarize the results. We observe that  $\mathcal{M}_4$  and  $\mathcal{M}_2$  perform best, with  $\mathcal{M}_4$  tending to perform better. As stated earlier,  $\mathcal{M}_4$  becomes equivalent to  $\mathcal{M}_2$  when the learning curve resides entirely in the power law regime, hence the similar performance. Figure 9 displays the scaling exponents  $c$  predicted by each estimator as a function of the architecture size. We observe that  $\mathcal{M}_1$  and  $\mathcal{M}_3$  produce estimates of  $c$  that are small in absolute magnitude. However, in  $\mathcal{M}_2$  and  $\mathcal{M}_4$ , the scaling exponent is close to  $-1/3$  and decreases (in absolute magnitude) for larger models.

## 5.4 Scalable Tasks from the BIG-Bench Evaluation Benchmark

Finally, we evaluate the scaling law estimators on language tasks from the BIG-Bench collaborative benchmark [6]. Here, we pretrain a 262M-parameter decoder-only transformer (middle architecture in Figure 8) on language modeling and evaluate its 1-shot and 2-shot capabilities in five language-related tasks. We choose the five tasks that exhibit the highest learnability from the benchmark (i.e. improvement in performance when pretrained on language modeling, see [6] for details). The five tasks are: `linguistic_mappings`, `qa_wikidata`, `unit_conversion`, `mult_data_wrangling` and `date_understanding`. We use the benchmark’s preferred metrics in all cases, which is either “multiple choice grade” or “exact string match” depending on the task. Table 3 and Figure 1 summarize the results. In this evaluation, both  $\mathcal{M}_3$  and  $\mathcal{M}_4$  perform best and equally well. In addition, we observe that  $\mathcal{M}_1$  and  $\mathcal{M}_2$  perform equally well and consistently worse than the other methods. One possible reason is that the learning curves are quite noisy (see Appendix A.2).

## 6 Discussion

The remarkable progress in deep learning in recent years is largely driven by improvements in scale, where bigger models are trained on larger datasets for longer training schedules. Several works observe that the benefit of scale can be predicted empirically by extrapolating from learning curves and this has found important applications, such as in sample size planning and neural architecture search. However, to achieve such benefits in practice, it is imperative that scaling laws extrapolate accurately. We demonstrate that scaling parameters that yield the best fit to the learning curve do not generally extrapolate best, thereby challenging their use as valid estimate of scaling law parameters. Hence, we argue for a more rigorous validation of scaling law parameters based on the extrapolation loss. In addition, we present a recipe for estimating scaling law parameters that extrapolates more accurately than in previous works, which we verify in several state-of-the-art architecture across a wide range of domains. To facilitate research in this domain, we also release a benchmark dataset comprising of 90 evaluation tasks. We believe that the proposed scaling law estimator can be utilized, for example, to accelerate neural architecture search (NAS), which we plan to study in future work.

## Acknowledgements

The authors would like to acknowledge and thank Behrooz Ghorbani for his feedback on earlier drafts of this manuscript as well as Ambrose Slone and Lucas Beyer for their help with some of the experiments. We also would like to thank Daniel Keysers and Olivier Bousquet for the useful discussions.

## References

- [1] Samira Abnar, Mostafa Dehghani, Behnam Neyshabur, and Hanie Sedghi. Exploring the limits of large scale pre-training. *arXiv preprint arXiv:2110.02095*, 2021.
- [2] Yasaman Bahri, Ethan Dyer, Jared Kaplan, Jaehoon Lee, and Utkarsh Sharma. Explaining neural scaling laws. *arXiv preprint arXiv:2102.06701*, 2021.
- [3] Yamini Bansal, Behrooz Ghorbani, Ankush Garg, Biao Zhang, Maxim Krikun, Colin Cherry, Behnam Neyshabur, and Orhan Firat. Data scaling laws in NMT: The effect of noise and architecture. *arXiv preprint arXiv:2202.01994*, 2022.
- [4] Claudia Beleites, Ute Neugebauer, Thomas Bocklitz, Christoph Krafft, and Jürgen Popp. Sample size planning for classification models. *Analytica chimica acta*, 760:25–33, 2013.
- [5] Lucas Beyer, Xiaohua Zhai, Amélie Royer, Larisa Markeeva, Rohan Anil, and Alexander Kolesnikov. Knowledge distillation: A good teacher is patient and consistent. *arXiv preprint arXiv:2106.05237*, 2021.
- [6] BIG-bench collaboration. Beyond the imitation game: Measuring and extrapolating the capabilities of language models. *In preparation*, 2021.

- [7] Olivier Bousquet, Steve Hanneke, Shay Moran, Ramon Van Handel, and Amir Yehudayoff. A theory of universal learning. In *Proceedings of the 53rd Annual ACM SIGACT Symposium on Theory of Computing*, pages 532–541, 2021.
- [8] Tom Brown, Benjamin Mann, Nick Ryder, Melanie Subbiah, Jared D Kaplan, Prafulla Dhariwal, Arvind Neelakantan, Pranav Shyam, Girish Sastry, Amanda Askell, et al. Language models are few-shot learners. *NeurIPS*, 33:1877–1901, 2020.
- [9] Junghwan Cho, Kyewook Lee, Ellie Shin, Garry Choy, and Synho Do. How much data is needed to train a medical image deep learning system to achieve necessary high accuracy? *arXiv preprint arXiv:1511.06348*, 2015.
- [10] Zihang Dai, Hanxiao Liu, Quoc V Le, and Mingxing Tan. Coatnet: Marrying convolution and attention for all data sizes. *NeurIPS*, 34:3965–3977, 2021.
- [11] Jia Deng, Wei Dong, Richard Socher, Li-Jia Li, Kai Li, and Li Fei-Fei. Imagenet: A large-scale hierarchical image database. In *CVPR*, 2009.
- [12] Jacob Devlin, Ming-Wei Chang, Kenton Lee, and Kristina Toutanova. Bert: Pre-training of deep bidirectional transformers for language understanding. *arXiv preprint arXiv:1810.04805*, 2018.
- [13] Tobias Domhan, Jost Tobias Springenberg, and Frank Hutter. Speeding up automatic hyperparameter optimization of deep neural networks by extrapolation of learning curves. In *IJCAI*, 2015.
- [14] Alexey Dosovitskiy, Lucas Beyer, Alexander Kolesnikov, Dirk Weissenborn, Xiaohua Zhai, Thomas Unterthiner, Mostafa Dehghani, Matthias Minderer, Georg Heigold, Sylvain Gelly, et al. An image is worth 16x16 words: Transformers for image recognition at scale. *ICLR*, 2020.
- [15] Thomas Elsken, Jan Hendrik Metzen, and Frank Hutter. Neural architecture search: A survey. *JMLR*, 20(1):1997–2017, 2019.
- [16] Li Fei-Fei, Rob Fergus, and Pietro Perona. Learning generative visual models from few training examples: An incremental bayesian approach tested on 101 object categories. *Computer Vision and Pattern Recognition Workshop*, 2004.
- [17] Rosa L Figueroa, Qing Zeng-Treitler, Sasikiran Kandula, and Long H Ngo. Predicting sample size required for classification performance. *BMC medical informatics and decision making*, 12(1):1–10, 2012.
- [18] Behrooz Ghorbani, Orhan Firat, Markus Freitag, Ankur Bapna, Maxim Krikun, Xavier Garcia, Ciprian Chelba, and Colin Cherry. Scaling laws for neural machine translation. *arXiv preprint arXiv:2109.07740*, 2021.
- [19] Mitchell A Gordon, Kevin Duh, and Jared Kaplan. Data and parameter scaling laws for neural machine translation. In *EMNLP*, pages 5915–5922, 2021.
- [20] Joel Hestness, Sharan Narang, Newsha Ardalani, Gregory Diamos, Heewoo Jun, Hassan Kianinejad, Md Patwary, Mostofa Ali, Yang Yang, and Yanqi Zhou. Deep learning scaling is predictable, empirically. *arXiv preprint arXiv:1712.00409*, 2017.
- [21] Marcus Hutter. Learning curve theory. *arXiv preprint arXiv:2102.04074*, 2021.
- [22] Mark Johnson, Peter Anderson, Mark Dras, and Mark Steedman. Predicting accuracy on large datasets from smaller pilot data. In *Proceedings of the 56th Annual Meeting of the Association for Computational Linguistics*, pages 450–455, Melbourne, Australia, 2018. Association for Computational Linguistics.
- [23] Jared Kaplan, Sam McCandlish, Tom Henighan, Tom B Brown, Benjamin Chess, Rewon Child, Scott Gray, Alec Radford, Jeffrey Wu, and Dario Amodei. Scaling laws for neural language models. *arXiv preprint arXiv:2001.08361*, 2020.
- [24] Diederik P Kingma and Jimmy Ba. Adam: A method for stochastic optimization. *arXiv preprint arXiv:1412.6980*, 2014.

- [25] Aaron Klein, Stefan Falkner, Jost Tobias Springenberg, and Frank Hutter. Learning curve prediction with bayesian neural networks. In *ICLR*, 2017.
- [26] Alexander Kolesnikov, Lucas Beyer, Xiaohua Zhai, Joan Puigcerver, Jessica Yung, Sylvain Gelly, and Neil Houlsby. Big transfer (BiT): General visual representation learning. In *ECCV*, pages 491–507, 2020.
- [27] Alex Krizhevsky. Learning multiple layers of features from tiny images. Technical report, 2009.
- [28] Sayan Mukherjee, Pablo Tamayo, Simon Rogers, Ryan Rifkin, Anna Engle, Colin Campbell, Todd R Golub, and Jill P Mesirov. Estimating dataset size requirements for classifying dna microarray data. *Journal of computational biology*, 10(2):119–142, 2003.
- [29] Preetum Nakkiran, Behnam Neyshabur, and Hanie Sedghi. The deep bootstrap framework: Good online learners are good offline generalizers. *ICLR*, 2020.
- [30] Jonathan S Rosenfeld. Scaling laws for deep learning. *arXiv preprint arXiv:2108.07686*, 2021.
- [31] Jonathan S Rosenfeld, Amir Rosenfeld, Yonatan Belinkov, and Nir Shavit. A constructive prediction of the generalization error across scales. *arXiv preprint arXiv:1909.12673*, 2019.
- [32] Utkarsh Sharma and Jared Kaplan. Scaling laws from the data manifold dimension. *JMLR*, 23(9):1–34, 2022.
- [33] Noam Shazeer and Mitchell Stern. Adafactor: Adaptive learning rates with sublinear memory cost. In *ICML*, 2018.
- [34] Chen Sun, Abhinav Shrivastava, Saurabh Singh, and Abhinav Gupta. Revisiting unreasonable effectiveness of data in deep learning era. In *Proceedings of the IEEE international conference on computer vision*, pages 843–852, 2017.
- [35] Mingxing Tan and Quoc Le. Efficientnet: Rethinking model scaling for convolutional neural networks. In *ICML*, pages 6105–6114, 2019.
- [36] Romal Thoppilan, Daniel De Freitas, Jamie Hall, Noam Shazeer, Apoorv Kulshreshtha, Heng-Tze Cheng, Alicia Jin, Taylor Bos, Leslie Baker, Yu Du, et al. Lamda: Language models for dialog applications. *arXiv preprint arXiv:2201.08239*, 2022.
- [37] Ilya O Tolstikhin, Neil Houlsby, Alexander Kolesnikov, Lucas Beyer, Xiaohua Zhai, Thomas Unterthiner, Jessica Yung, Andreas Steiner, Daniel Keysers, Jakob Uszkoreit, et al. MLP-mixer: An all-MLP architecture for vision. *NeurIPS*, 34, 2021.
- [38] P. Welinder, S. Branson, T. Mita, C. Wah, F. Schroff, S. Belongie, and P. Perona. Caltech-UCSD Birds 200. Technical Report CNS-TR-2010-001, California Institute of Technology, 2010.
- [39] Ross Wightman, Hugo Touvron, and Hervé Jégou. Resnet strikes back: An improved training procedure in timm. *arXiv preprint arXiv:2110.00476*, 2021.
- [40] X Zhai, A Kolesnikov, N Houlsby, and L Beyer. Scaling vision transformers. *arXiv preprint arXiv:2106.04560*, 2021.

## Checklist

1. For all authors...
  - (a) Do the main claims made in the abstract and introduction accurately reflect the paper’s contributions and scope? **[Yes]**
  - (b) Did you describe the limitations of your work? **[N/A]** We are aware of many applications using learning curve extrapolation, and plan to apply our new recipe to new applications (e.g. NAS) to land the impact.
  - (c) Did you discuss any potential negative societal impacts of your work? **[N/A]** We provide a study of scaling laws and an improved estimator of scaling law parameters. We do not anticipate any negative societal impacts of this work.

- (d) Have you read the ethics review guidelines and ensured that your paper conforms to them? [\[Yes\]](#)
2. If you are including theoretical results...
    - (a) Did you state the full set of assumptions of all theoretical results? [\[N/A\]](#)
    - (b) Did you include complete proofs of all theoretical results? [\[N/A\]](#)
  3. If you ran experiments...
    - (a) Did you include the code, data, and instructions needed to reproduce the main experimental results (either in the supplemental material or as a URL)? [\[Yes\]](#) We plan to release the code and a benchmark dataset to facilitate research in this direction. Some of the datasets used in our experiments are proprietary and cannot be released, such as JFT-300M. We also include experiments on publicly available datasets, such as Big-Bench for reproducibility.
    - (b) Did you specify all the training details (e.g., data splits, hyperparameters, how they were chosen)? [\[Yes\]](#) We describe the data, training procedure and architectures in details. See Section 5.
    - (c) Did you report error bars (e.g., with respect to the random seed after running experiments multiple times)? [\[Yes\]](#) Please see Tables 3 and 2.
    - (d) Did you include the total amount of compute and the type of resources used (e.g., type of GPUs, internal cluster, or cloud provider)? [\[Yes\]](#) All experiments are executed in Tensor Processing Units (TPUs). See Section 5.
  4. If you are using existing assets (e.g., code, data, models) or curating/releasing new assets...
    - (a) If your work uses existing assets, did you cite the creators? [\[Yes\]](#) We cite all the datasets and architectures we use.
    - (b) Did you mention the license of the assets? [\[No\]](#)
    - (c) Did you include any new assets either in the supplemental material or as a URL? [\[Yes\]](#) We plan to release a code and a benchmark dataset.
    - (d) Did you discuss whether and how consent was obtained from people whose data you're using/curating? [\[N/A\]](#)
    - (e) Did you discuss whether the data you are using/curating contains personally identifiable information or offensive content? [\[N/A\]](#)
  5. If you used crowdsourcing or conducted research with human subjects...
    - (a) Did you include the full text of instructions given to participants and screenshots, if applicable? [\[N/A\]](#)
    - (b) Did you describe any potential participant risks, with links to Institutional Review Board (IRB) approvals, if applicable? [\[N/A\]](#)
    - (c) Did you include the estimated hourly wage paid to participants and the total amount spent on participant compensation? [\[N/A\]](#)

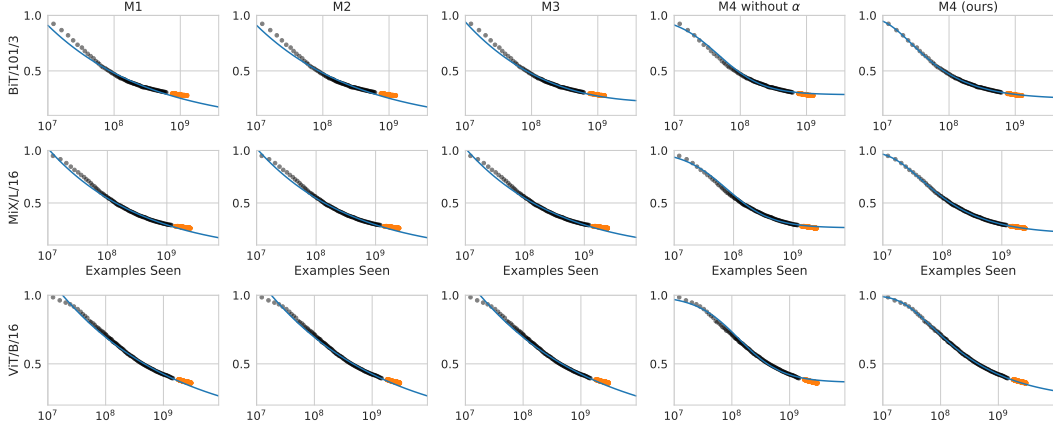

Figure 10: ImageNet 10-shot accuracy ( $y$ -axis) vs. the number of bootstrapped examples seen during upstream training in BiT/101/3, MiX/L/16 and ViT/B/16 (see Figures 1 and 5 in the main paper). Here, we evaluate a version of the  $\mathcal{M}_4$  estimator that does not contain the  $\alpha$  parameter for a comparison. See Section A.1.

## A Appendix

### A.1 Ablation

In this section, we show that the improvement in  $\mathcal{M}_4$  compared to  $\mathcal{M}_2$  is due to both of the conditions discussed in Section 3: (1)  $\mathcal{M}_4$  has a sigmoid-like shape so that it can handle deviations from the power law behavior and (2) it contains all of the functions in  $\mathcal{M}_2$  so that  $\mathcal{M}_4$  reduces to  $\mathcal{M}_2$  when the learning curve falls entirely in the power law regime.

First, we observe that the second condition alone is not sufficient to have a high extrapolation accuracy since  $\mathcal{M}_2$  itself has a less extrapolation accuracy than  $\mathcal{M}_4$ . To show that a sigmoid-like behavior is not sufficient, we evaluate a different version of  $\mathcal{M}_4$ , in which  $\alpha$  is not introduced. Recall that the parameter  $\alpha$  was introduced so that  $\mathcal{M}_4$  contains  $\mathcal{M}_2$ . Figure 10 and Table 4 present the extrapolation performance of all the estimators when using 10-shot ImageNet accuracy as a metric. We observe that  $\mathcal{M}_4$  without the  $\alpha$  parameter does not perform as well as when  $\alpha$  is introduced.

Table 4: Extrapolation RMSE of the scaling law estimators in image classification using 10-shot ImageNet metric for  $\mathcal{M}_4$  without the  $\alpha$  parameter compared to the proposed  $\mathcal{M}_4$  estimator.

|           | without $\alpha$              | M4 (ours)                     |
|-----------|-------------------------------|-------------------------------|
| BiT/101/3 | $5.1 \pm 0.10 \times 10^{-2}$ | $1.7 \pm 0.05 \times 10^{-2}$ |
| BiT/50/1  | $3.1 \pm 0.04 \times 10^{-2}$ | $0.9 \pm 0.02 \times 10^{-2}$ |
| MiX/B/16  | $4.6 \pm 0.05 \times 10^{-2}$ | $1.3 \pm 0.02 \times 10^{-2}$ |
| MiX/L/16  | $4.4 \pm 0.06 \times 10^{-2}$ | $1.0 \pm 0.03 \times 10^{-2}$ |
| ViT/B/16  | $4.3 \pm 0.06 \times 10^{-2}$ | $2.2 \pm 0.04 \times 10^{-2}$ |
| ViT/S/16  | $5.1 \pm 0.04 \times 10^{-2}$ | $3.1 \pm 0.04 \times 10^{-2}$ |

### A.2 Big Bench Learning Curves

In Figure 11, we plot the learning curves in the BIG-bench evaluation tasks. We observe that the learning curves are noisier in this setting than in previous cases.

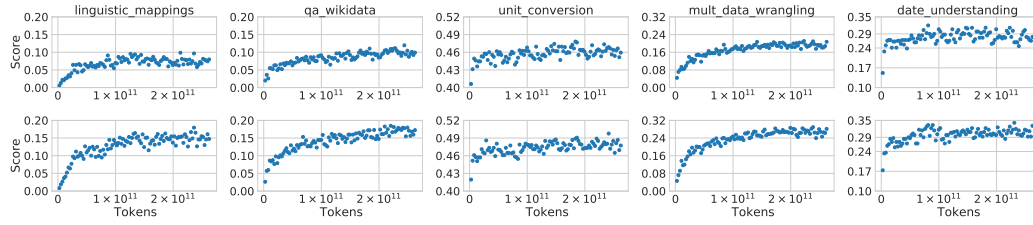

Figure 11: Learning curves are plotted for five tasks in BIG-Bench [6] when pretraining a 262M decoder-only architecture on language modeling. The benchmark’s preferred score is used: “multiple choice grade” for unit\_conversion and date\_understanding, and “string match”, otherwise.

### A.3 Image Classification Full Figures

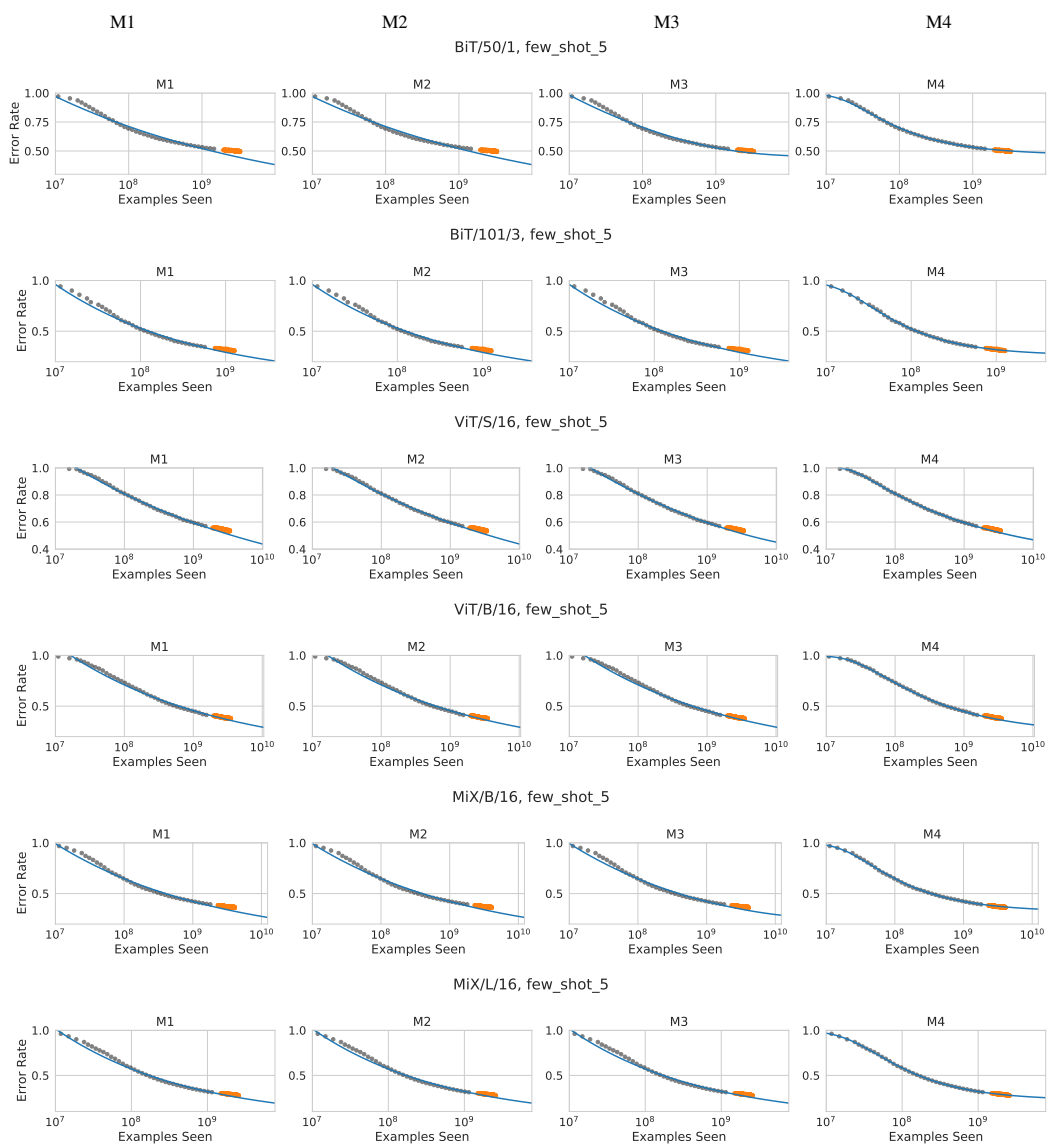

Figure 12: ImageNet 5-shot.



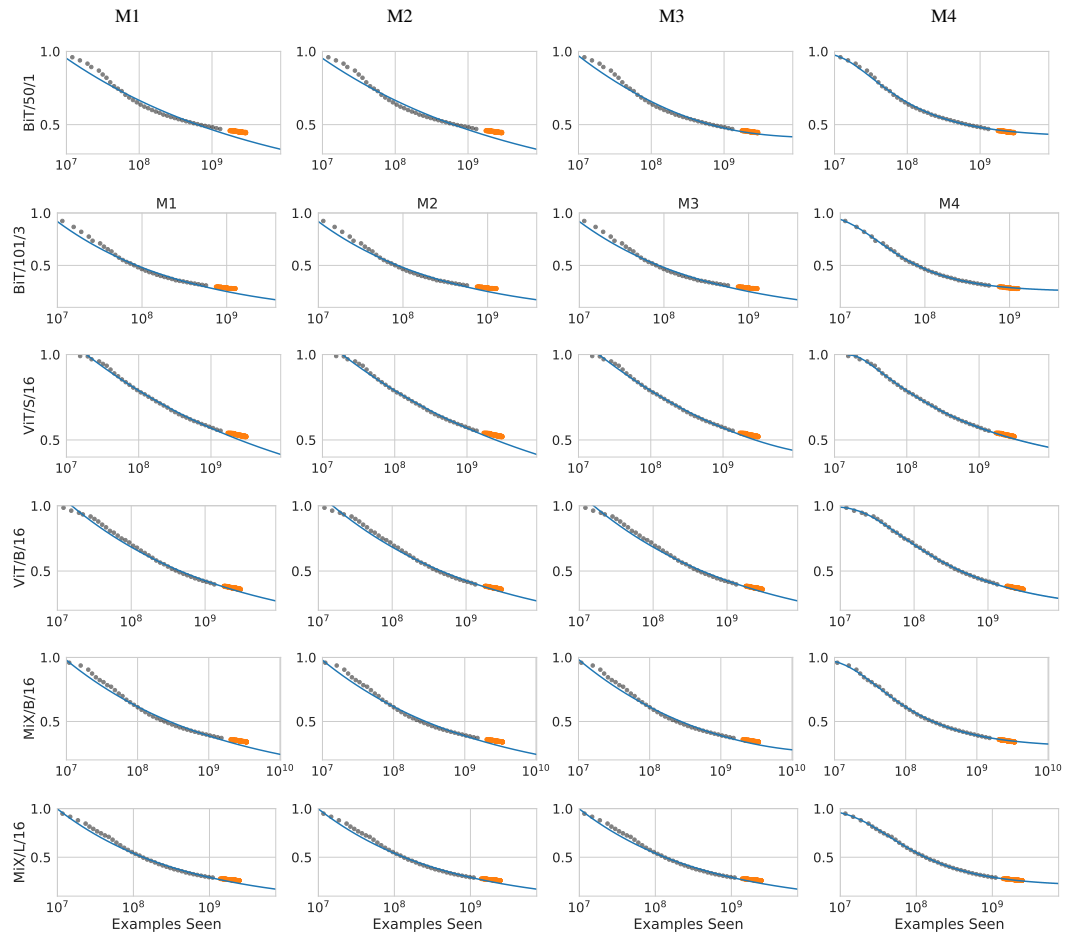

Figure 13: ImageNet 10-shot.

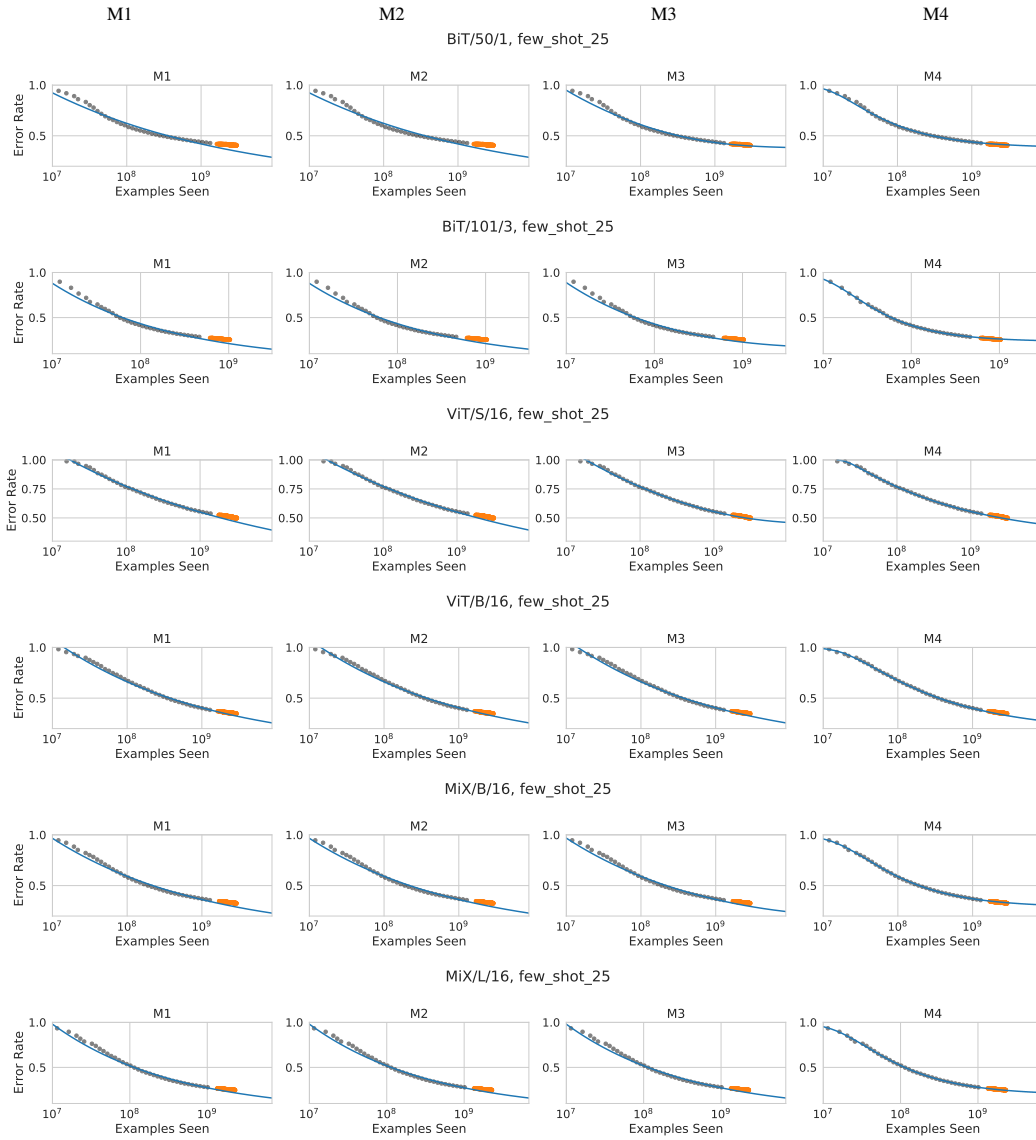

Figure 14: ImageNet 25-shot.

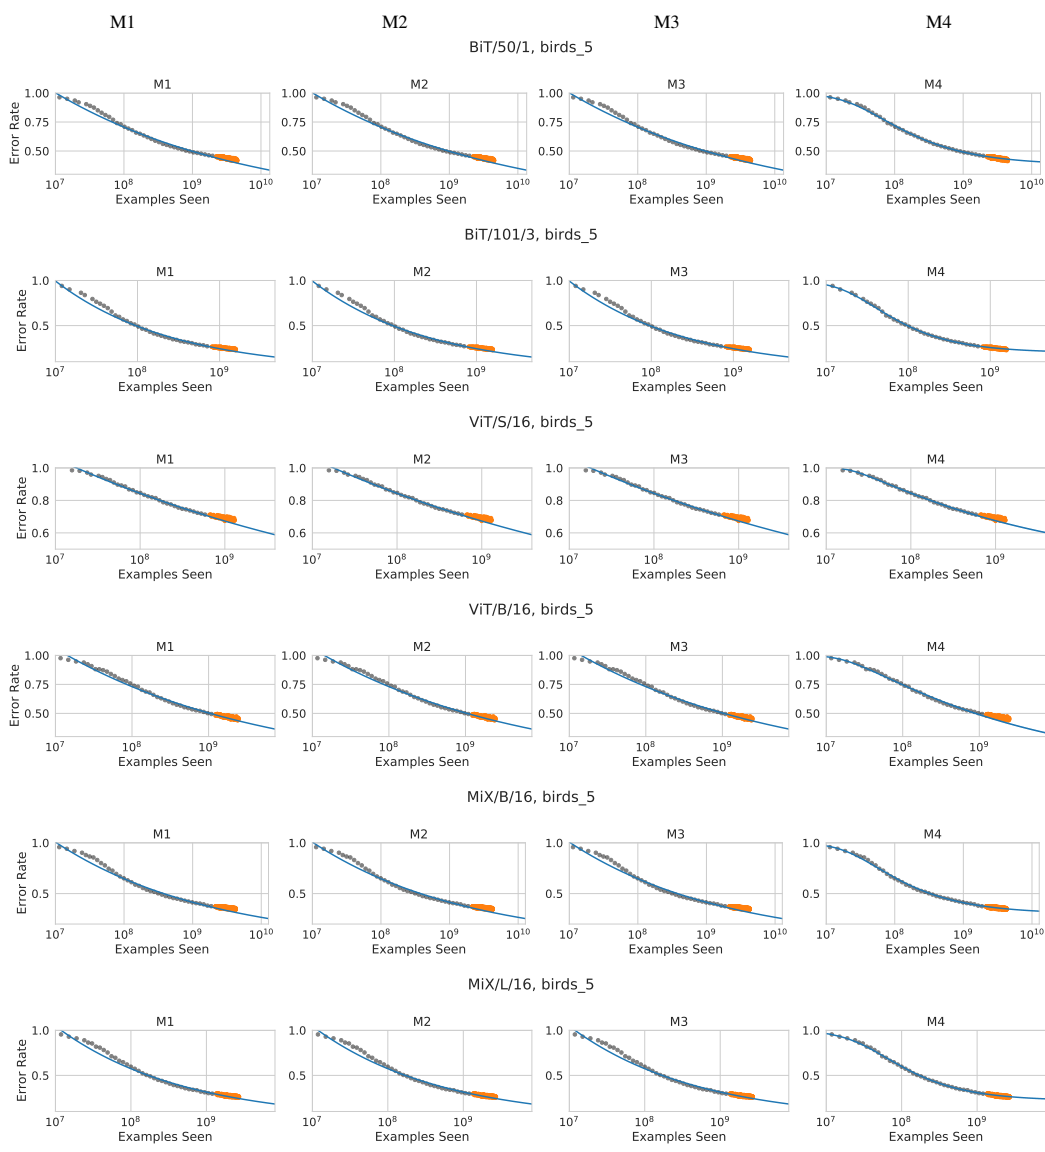

Figure 15: Birds2010 5-shot.

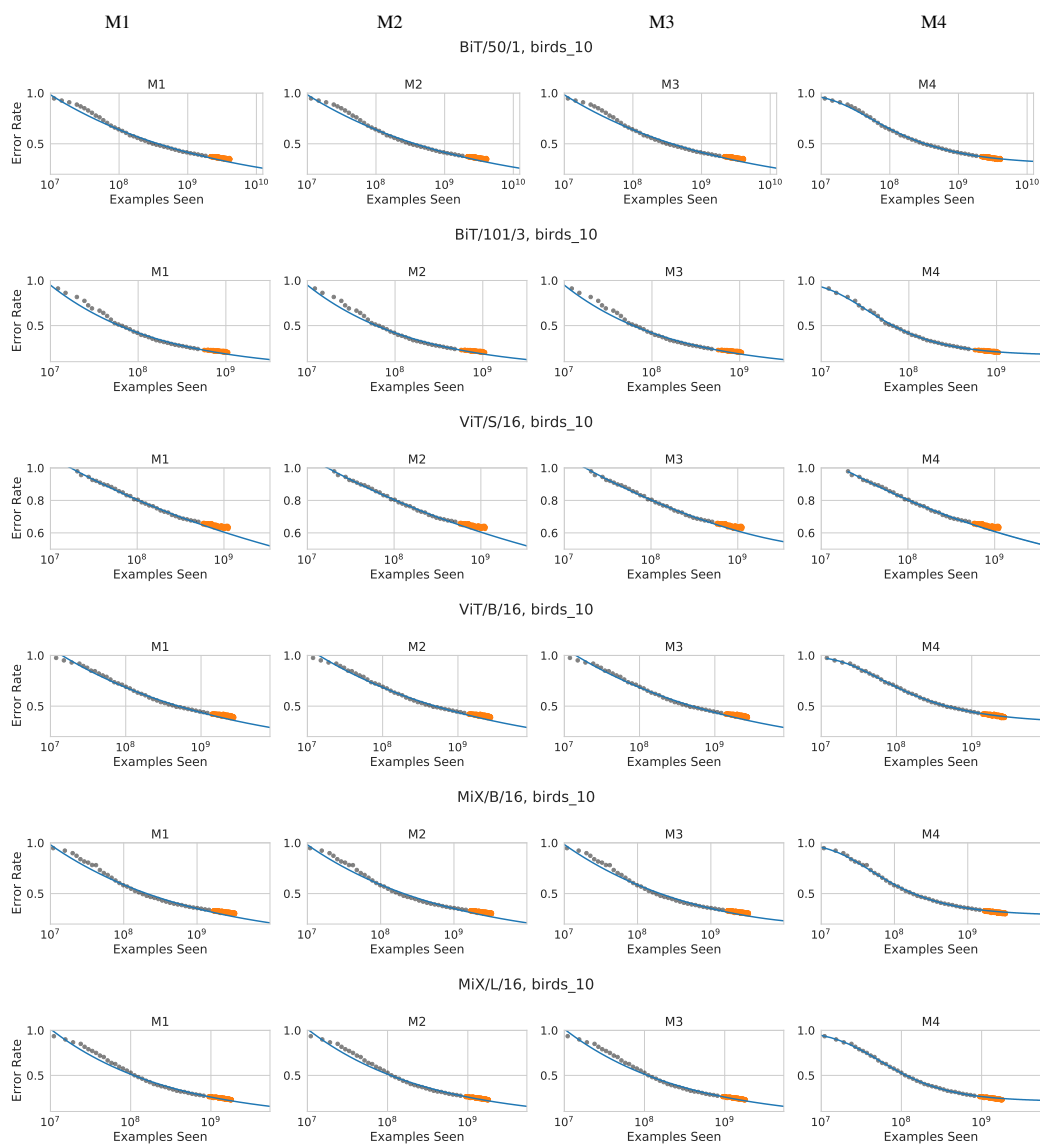

Figure 16: Birds2010 10-shot.

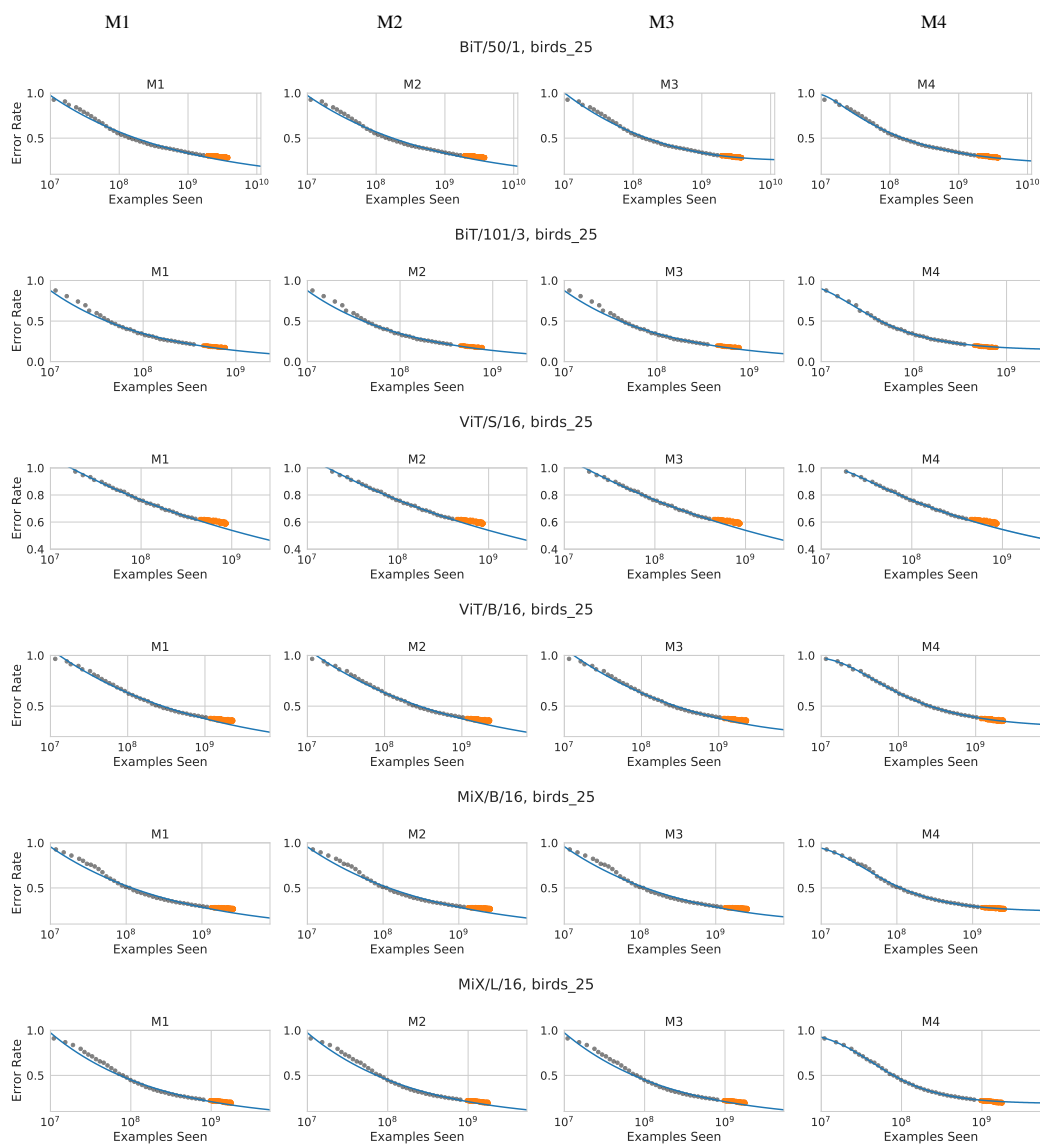

Figure 17: Birds2010 25-shot.

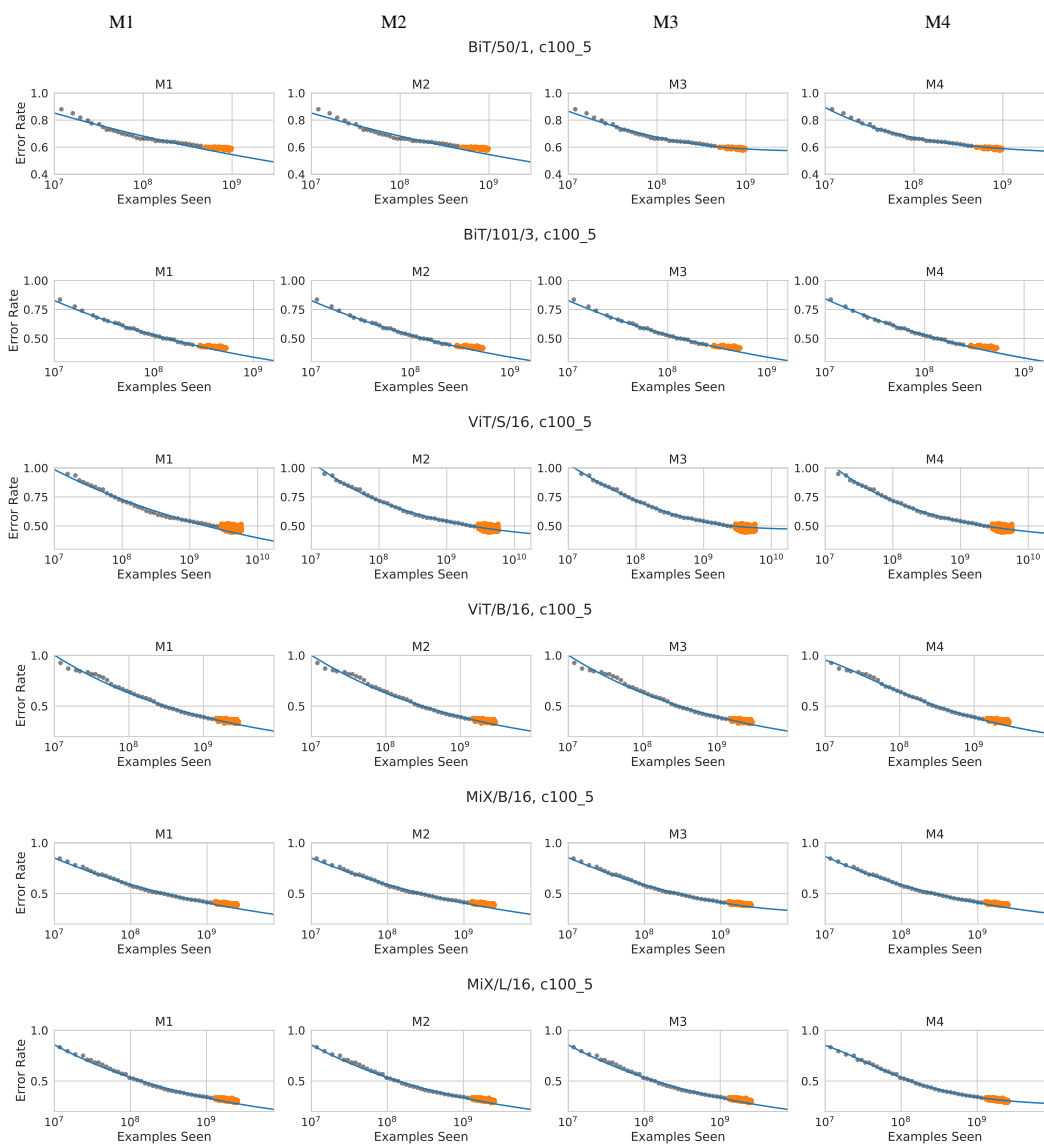

Figure 18: CIFAR100 5-shot.

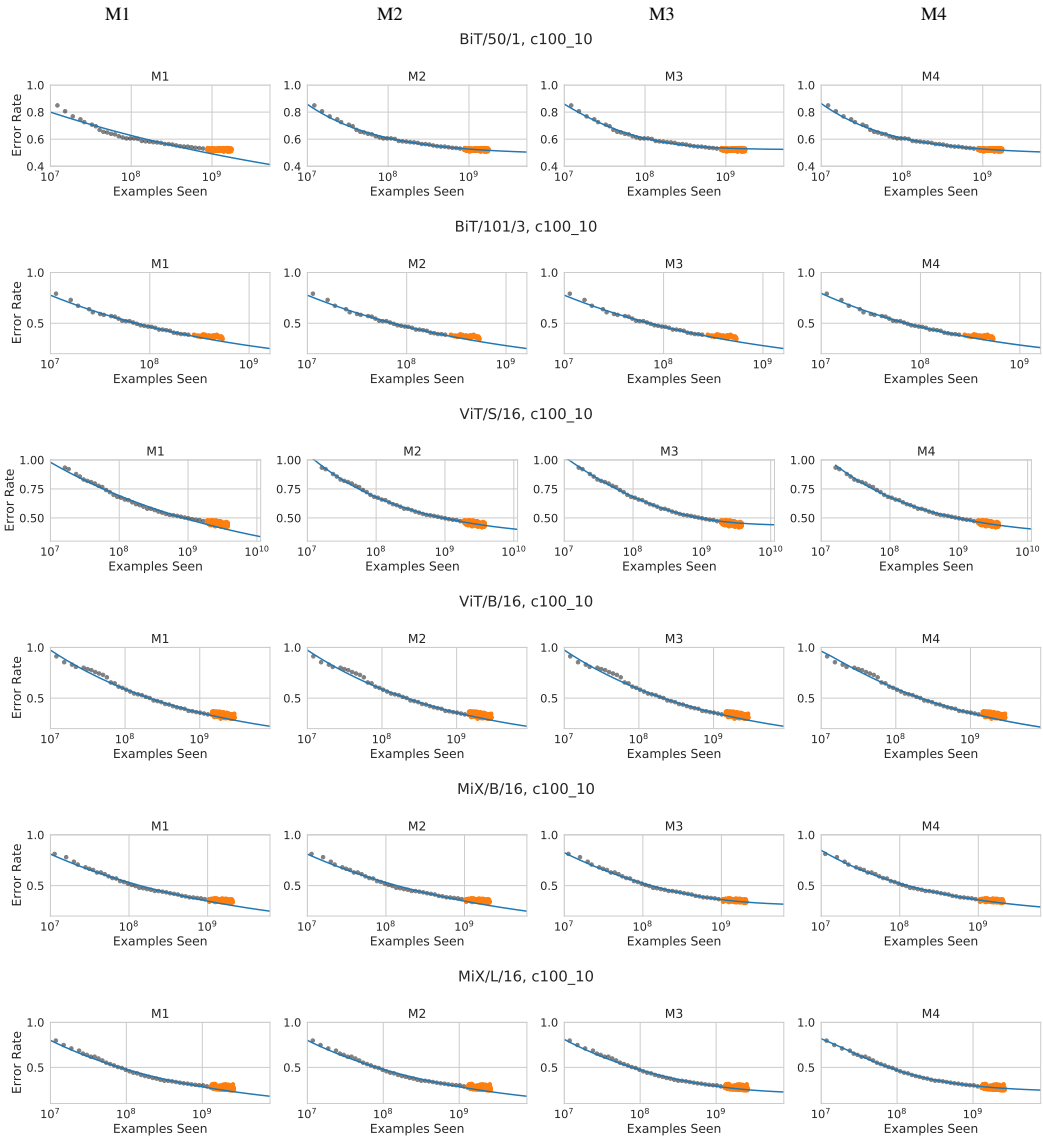

Figure 19: CIFAR100 10-shot.

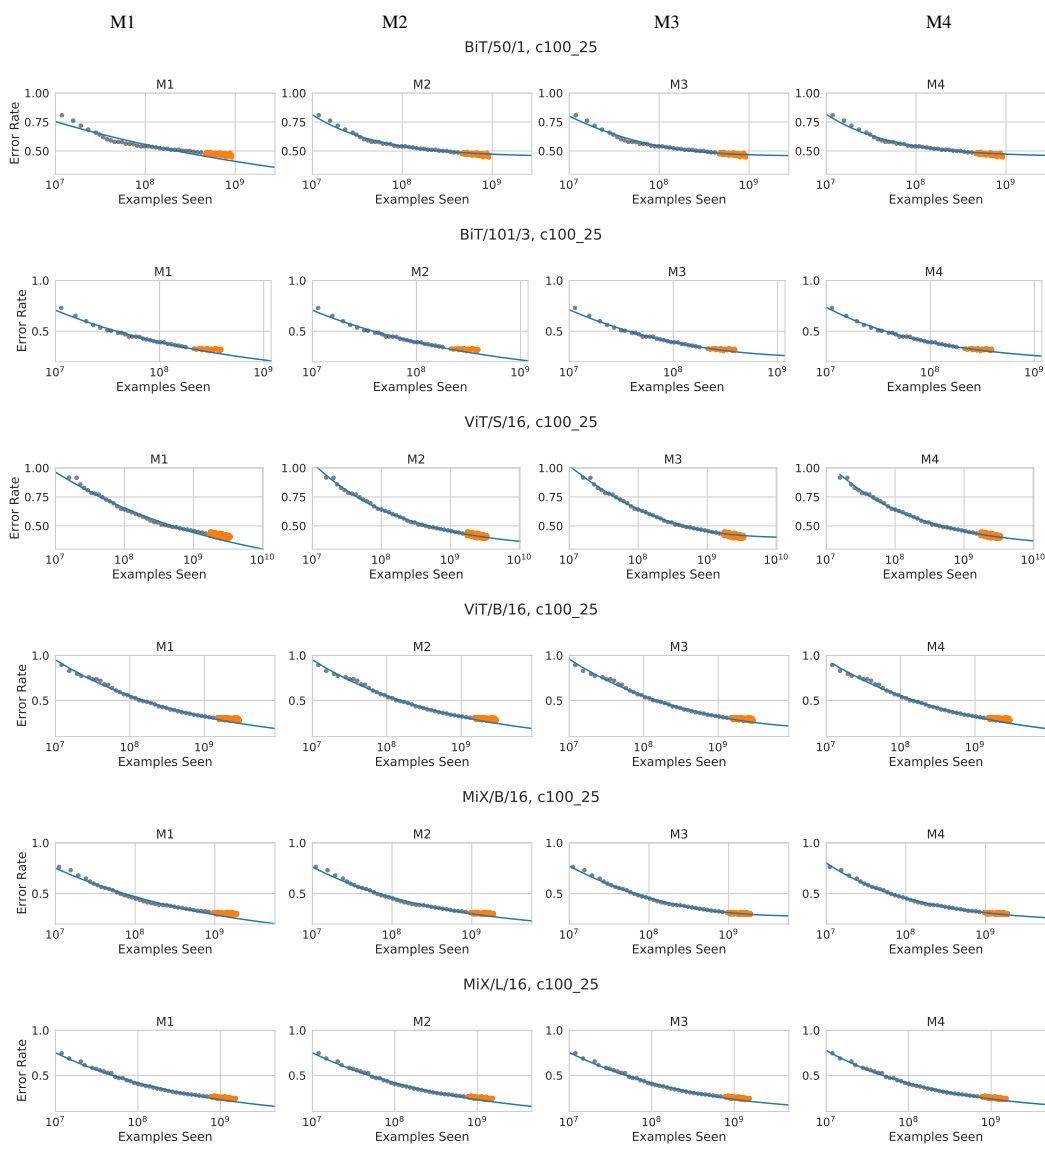

Figure 20: CIFAR100 25-shot.



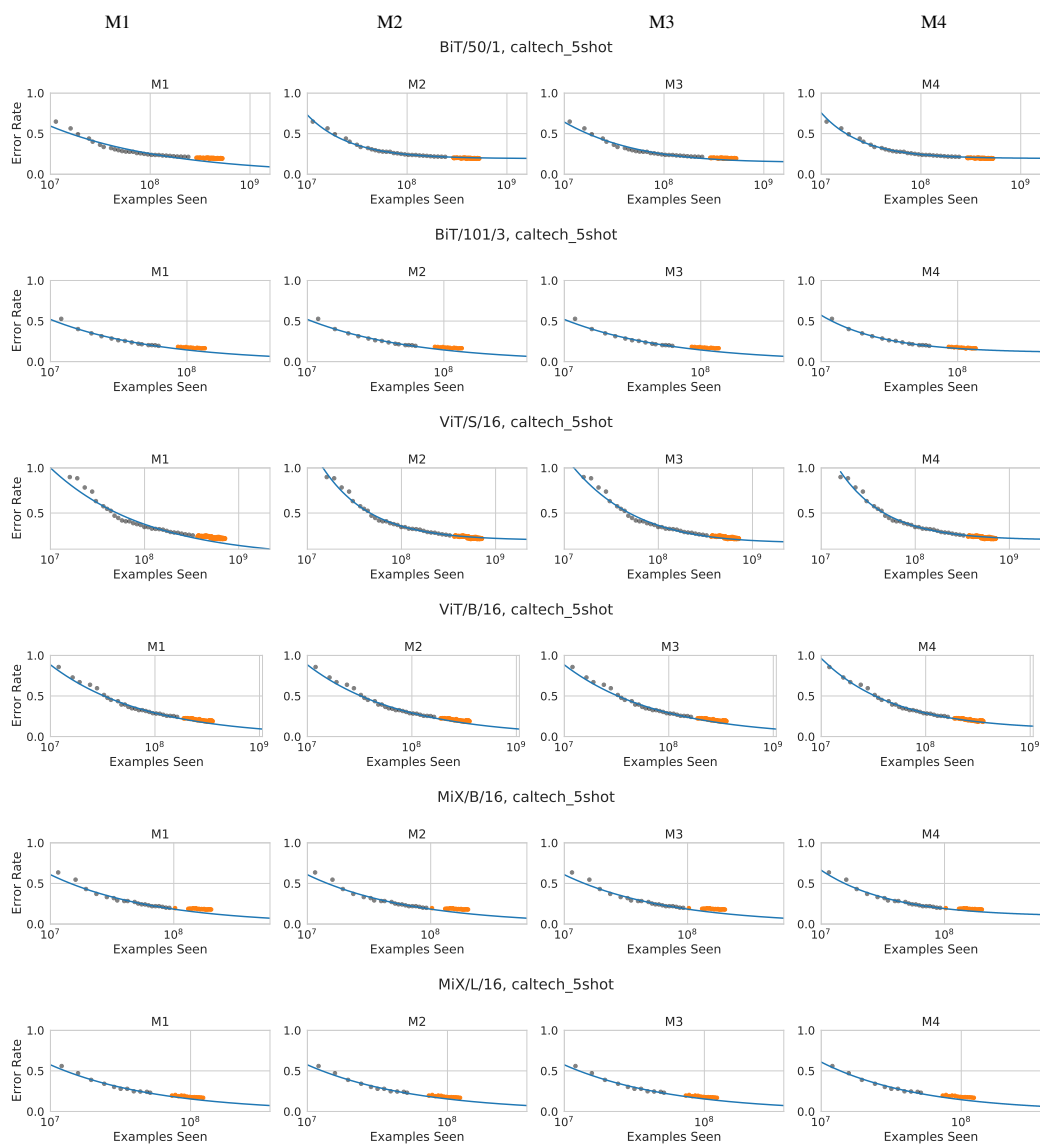

Figure 21: Caltech101 5-shot.

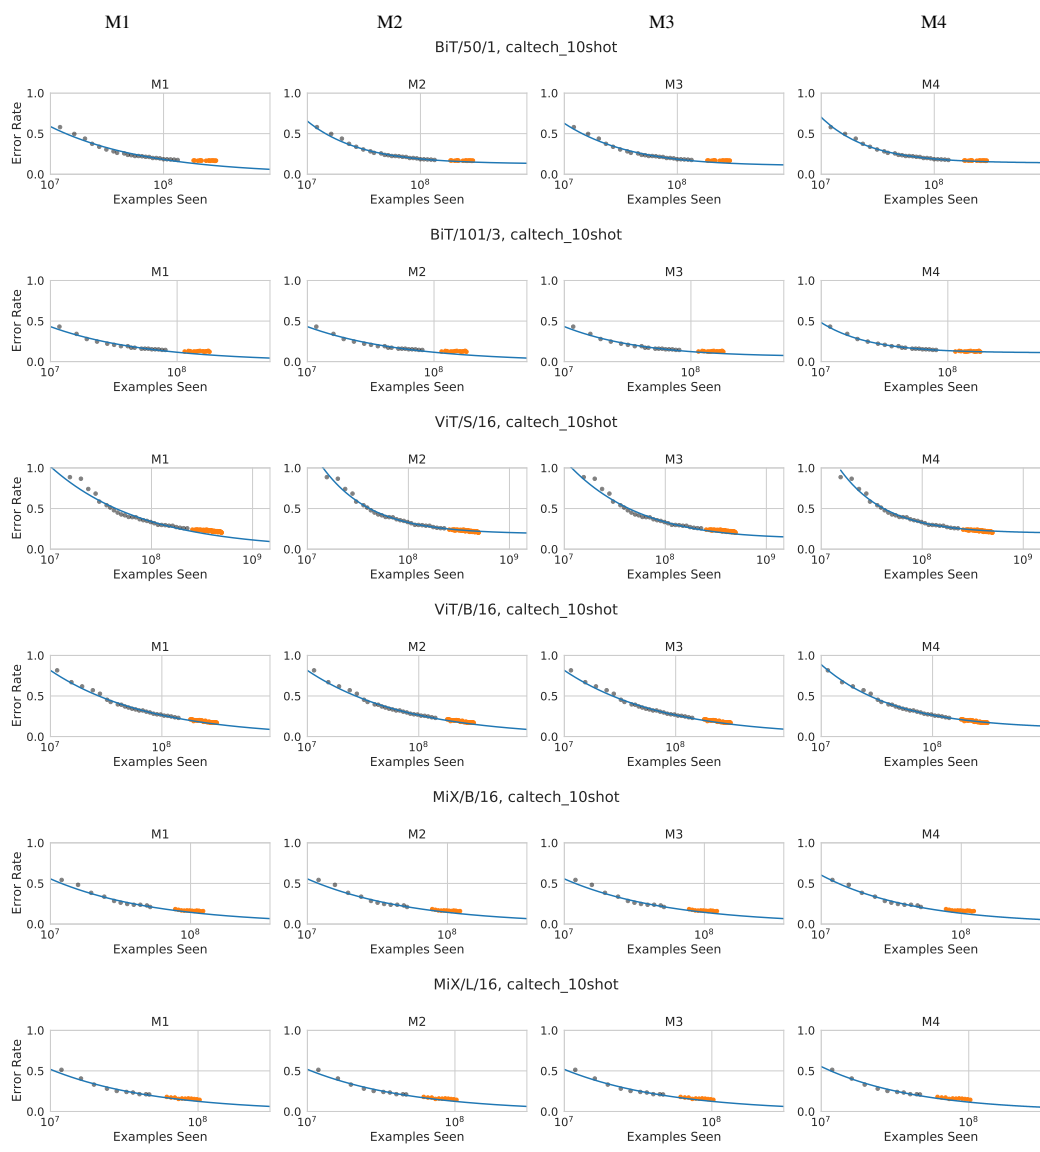

Figure 22: Caltech101 10-shot.

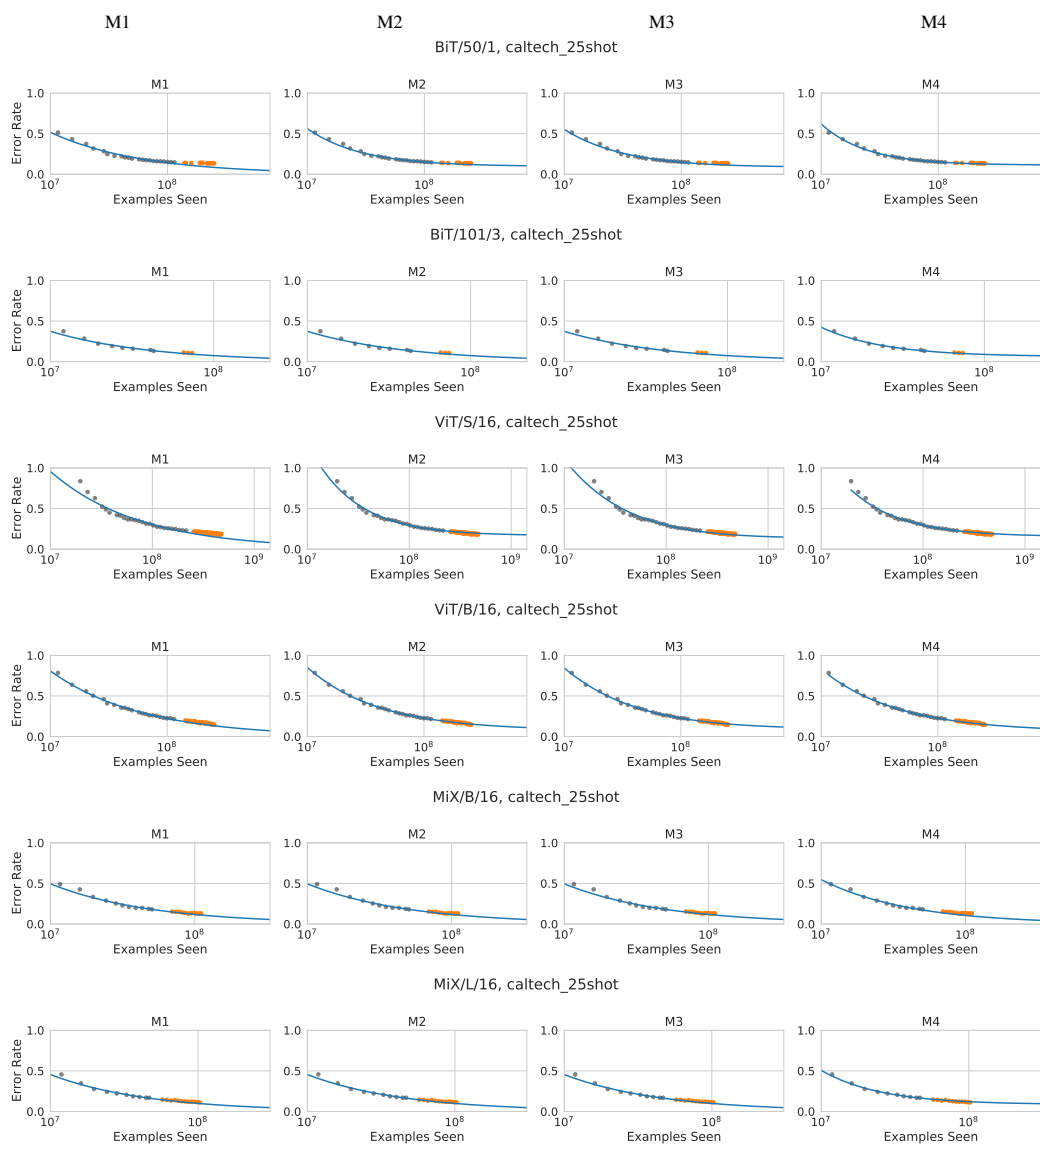

Figure 23: Caltech101 25-shot.
